# Supplementary material for: C(sp3)–H activation-enabled cross-coupling of two aryl halides: an approach to 9,10-dihydrophenanthrenes
Source: Royal Society of Chemistry journal article supplement (doi:10.1039/d0cc04602g), 2020-01-01

## Supporting Information

### **C(sp<sup>3</sup>)-H Activation-Enabled Cross-Coupling of Two Aryl Halides: An Approach to 9,10-Dihydrophenanthrenes**

Yichao Gu, Xueliang Sun, Bin Wan, Zhuoer Lu, Yanghui Zhang\*

*School of Chemical Science and Engineering, Shanghai Key Laboratory of Chemical Assessment and  
Sustainability, Tongji University, 1239 Siping Road, Shanghai 200092, P. R. China.*

## Contents

|                                                       |    |
|-------------------------------------------------------|----|
| 1. General Information .....                          | 2  |
| 2. Synthesis of the Substrates .....                  | 2  |
| 3. General Procedure for the Coupling Reaction .....  | 2  |
| 4. Synthesis of Palladacycle <b>1a-C</b> .....        | 3  |
| 5. Time-Course of Yields.....                         | 3  |
| 6. Crystal Data and Structure Refinement for 3ad..... | 4  |
| 7. Characterization of the Products .....             | 5  |
| 8. References .....                                   | 13 |
| 9. NMR Spectra.....                                   | 14 |

## 1. General Information

$\text{Pd}(\text{OAc})_2$  was purchased from Strem Chemicals. All the solvents were purified by distillation prior to use. The substrates were synthesized according to reported procedures. Unless otherwise noted, the other commercial chemicals were used without further purification.  $^1\text{H}$  NMR and  $^{13}\text{C}$  NMR spectra were recorded on Bruker ARX400 instrument (400 MHz) or Bruker DRX-600 instrument (600 MHz). High resolution mass spectra were measured on Bruker microTOF II ESI-TOF mass spectrometer. GC-MS data were tested with ThermoFisher Trace1300-ISQ (EI). NMR spectra were recorded in  $\text{CDCl}_3$ .  $^1\text{H}$  NMR spectra were referenced to residual  $\text{CHCl}_3$  at 7.26 ppm, and  $^{13}\text{C}$  NMR spectra were referenced to the central peak of  $\text{CDCl}_3$  at 77.0 ppm. Chemical shifts ( $\delta$ ) are reported in ppm, and coupling constants (J) are in Hertz (Hz). Multiplicities are reported using the following abbreviations: s = singlet, d = doublet, t = triplet, q = quartet, m = multiplet.

## 2. Synthesis of the Substrates

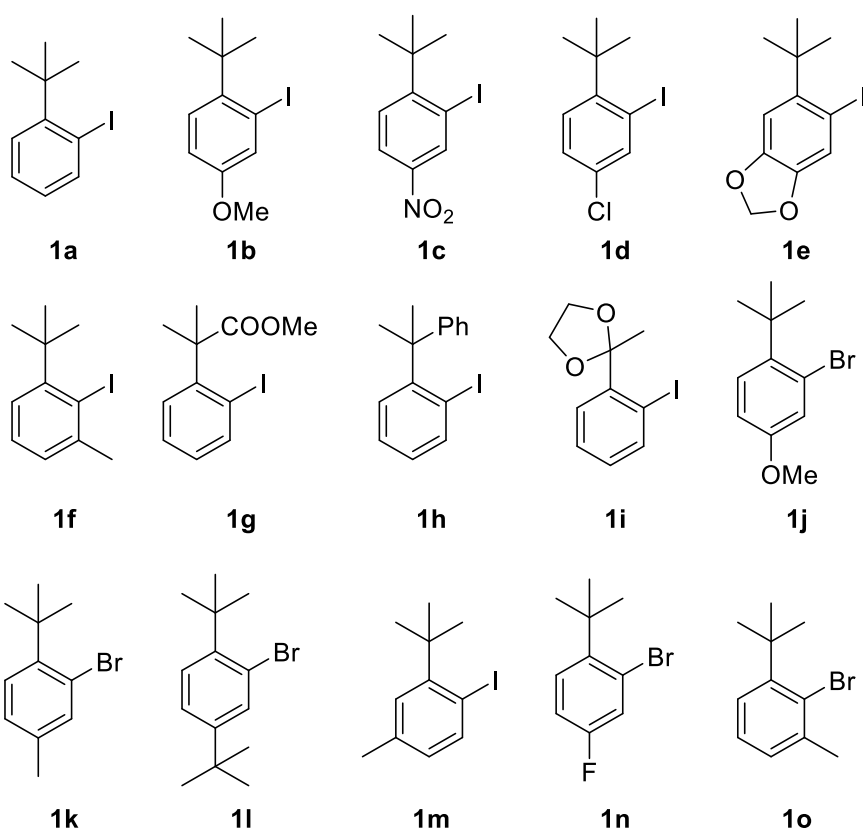

Substrate **1a-1o** were prepared by following the reported procedures.<sup>[1]</sup> All the 2-chlorobenzoic acids were commercially available.

## 3. General Procedure for the Coupling Reaction

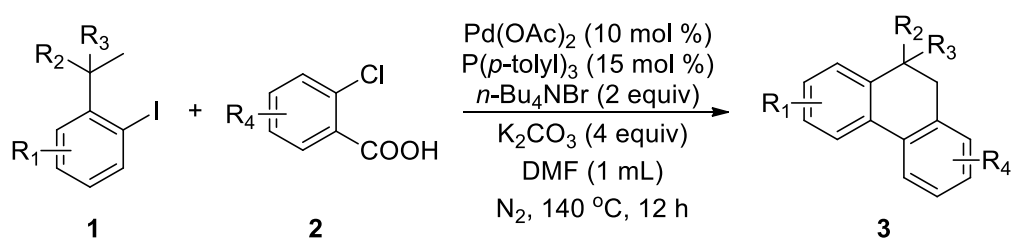

A 25 mL Schlenk-type tube (with a Teflon screw cap and a side arm) equipped with a magnetic

stir bar was charged with Pd(OAc)<sub>2</sub> (2.3 mg, 0.01 mmol), P(*p*-tol)<sub>3</sub> (4.5 mg, 0.015 mmol), K<sub>2</sub>CO<sub>3</sub> (55.2 mg, 0.4 mmol), *n*-Bu<sub>4</sub>NCl (55.6 mg, 0.2 mmol), the corresponding aryl halide (0.1 mmol), the corresponding 2-chlorobenzoic acid (0.15 mmol), and DMF (1 mL). The reaction was frozen with liquid nitrogen and then the tube was evacuated and backfilled with nitrogen (10 times). The reaction was stirred at 140 °C for 12 h. Upon completion, the reaction mixture was cooled to room temperature, diluted with EtOAc (15 mL) and washed with brine (15 mL, 3 times). The organic phase was dried over Na<sub>2</sub>SO<sub>4</sub>, filtered and concentrated *in vacuo*. The residue was purified by preparative silica gel TLC to afford the corresponding products.

#### 4. Synthesis of Palladacycle 1a-C

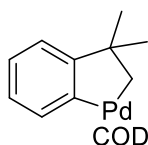

**1a-C** was prepared by following reported procedure.<sup>[2]</sup>

#### 5. Time-Course of Yields

Seven reactions of **1a** and **2a** were carried out by following the general procedure of the coupling reaction. Each of the reactions was stopped at the times indicated in the following table. The reactions were worked up by following the general procedure and the yields were determined by <sup>1</sup>H NMR analysis of the crude reaction mixture using CHCl<sub>2</sub>CHCl<sub>2</sub> as the internal standard.

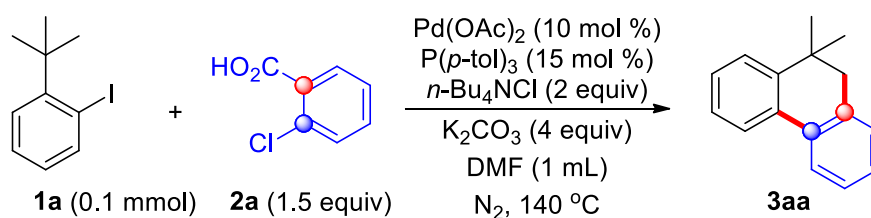

| Entry                   | 1  | 2  | 3  | 4  | 5  | 6  | 7   |
|-------------------------|----|----|----|----|----|----|-----|
| Reaction time (minutes) | 5  | 10 | 20 | 30 | 45 | 70 | 110 |
| Yield (%)               | 37 | 50 | 62 | 70 | 76 | 82 | 86  |

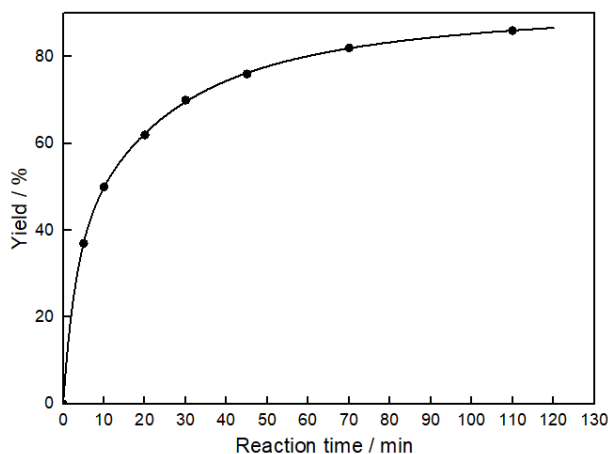

## 6 Crystal Data and Structure Refinement for 3ad

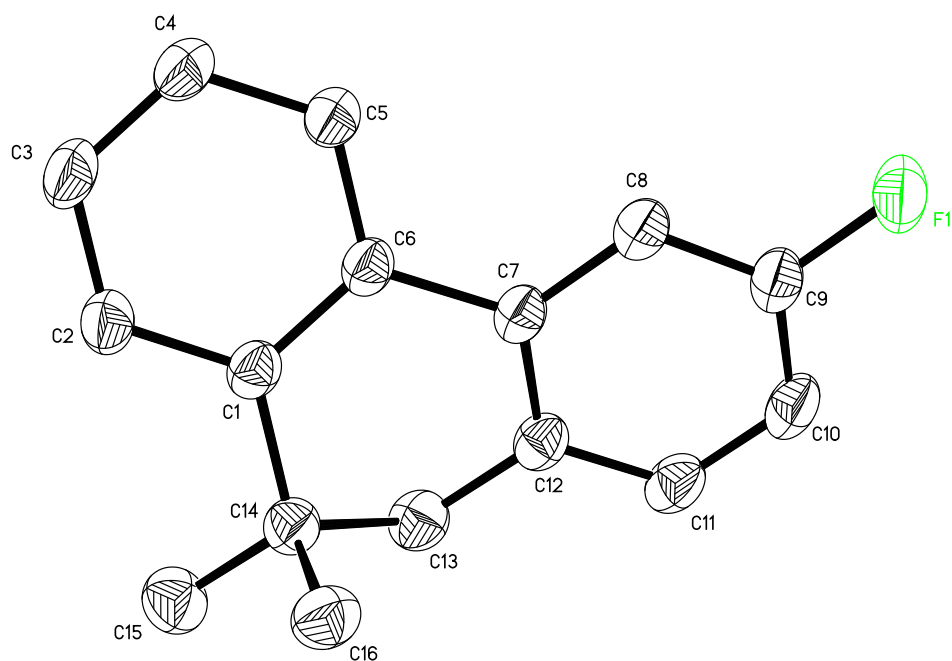

Table S1. Crystal data for 3ad

|                                 |                                        |                   |
|---------------------------------|----------------------------------------|-------------------|
| Identification code             | 200611a_a                              |                   |
| Empirical formula               | C <sub>16</sub> H <sub>15</sub> F      |                   |
| Formula weight                  | 226.28                                 |                   |
| Temperature                     | 281(2) K                               |                   |
| Wavelength                      | 0.71073 Å                              |                   |
| Crystal system                  | Monoclinic                             |                   |
| Space group                     | P2 <sub>1</sub> /c                     |                   |
| Unit cell dimensions            | a = 14.697(8) Å                        | α = 90°.          |
|                                 | b = 5.790(3) Å                         | β = 104.759(19)°. |
|                                 | c = 14.578(8) Å                        | γ = 90°.          |
| Volume                          | 1199.5(11) Å <sup>3</sup>              |                   |
| Z                               | 4                                      |                   |
| Density (calculated)            | 1.253 Mg/m <sup>3</sup>                |                   |
| Absorption coefficient          | 0.082 mm <sup>-1</sup>                 |                   |
| F(000)                          | 480                                    |                   |
| Crystal size                    | 0.290 x 0.280 x 0.070 mm <sup>3</sup>  |                   |
| Theta range for data collection | 2.867 to 25.334°.                      |                   |
| Index ranges                    | -17 ≤ h ≤ 17, -6 ≤ k ≤ 6, -17 ≤ l ≤ 17 |                   |

|                                   |                                             |
|-----------------------------------|---------------------------------------------|
| Reflections collected             | 13101                                       |
| Independent reflections           | 2173 [R(int) = 0.0505]                      |
| Completeness to theta = 25.242°   | 99.9 %                                      |
| Absorption correction             | Semi-empirical from equivalents             |
| Refinement method                 | Full-matrix least-squares on F <sup>2</sup> |
| Data / restraints / parameters    | 2173 / 0 / 157                              |
| Goodness-of-fit on F <sup>2</sup> | 1.035                                       |
| Final R indices [I > 2σ(I)]       | R1 = 0.0570, wR2 = 0.1493                   |
| R indices (all data)              | R1 = 0.0756, wR2 = 0.1688                   |
| Extinction coefficient            | 0.026(5)                                    |
| Largest diff. peak and hole       | 0.198 and -0.208 e.Å <sup>-3</sup>          |

CCDC 2013468.

## 7 Characterization of the Products

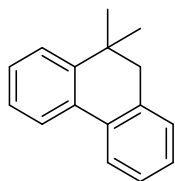

9,9-dimethyl-9,10-dihydrophenanthrene (**3aa**): colorless oil (18.3 mg, 88%)

<sup>1</sup>H NMR (600 MHz, CDCl<sub>3</sub>) δ 7.78-7.75 (m, 2H), 7.42 (dd, J = 3.4, 5.7 Hz, 1H), 7.31-7.29 (m, 3H), 7.23 (dt, J = 1.0, 7.4 Hz, 1H), 7.20 (d, J = 7.3 Hz, 1H), 2.78 (s, 2H), 1.26 (s, 6H).

<sup>13</sup>C NMR (151 MHz, CDCl<sub>3</sub>) δ 145.42, 136.03, 134.18, 133.25, 128.65, 127.95, 127.43, 126.85, 126.55, 124.26, 124.09, 123.51, 44.05, 34.16, 27.93.

HRMS (ESI-TOF) *m/z*: calculated for C<sub>16</sub>H<sub>17</sub><sup>+</sup>: 209.1330 (M + H)<sup>+</sup>, found: 209.1337.

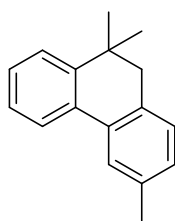

3,9,9-trimethyl-9,10-dihydrophenanthrene (**3ab**): colorless oil (15.5 mg, 70%)

<sup>1</sup>H NMR (600 MHz, CDCl<sub>3</sub>) δ 7.78-7.76 (m, 1H), 7.57 (s, 1H), 7.41-7.40 (m, 1H), 7.29-7.28 (m, 2H), 7.08 (d, J = 7.8 Hz, 1H), 7.05 (d, J = 7.8 Hz, 1H), 2.73 (s, 2H), 2.40 (s, 3H), 1.25 (s, 6H).

<sup>13</sup>C NMR (151 MHz, CDCl<sub>3</sub>) δ 145.53, 136.16, 133.97, 133.36, 133.03, 128.52, 128.16, 127.82, 126.49, 124.26, 124.25, 124.02, 43.66, 34.22, 27.96, 21.49.

MS (GC-MS) *m/z*: calculated for C<sub>17</sub>H<sub>18</sub>: 222.14, found: 222.14.

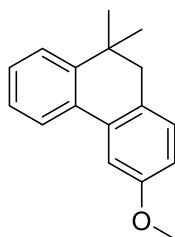

3-methoxy-9,9-dimethyl-9,10-dihydrophenanthrene (**3ac**): colorless oil (22.6 mg, 95%)

$^1\text{H NMR}$  (600 MHz,  $\text{CDCl}_3$ )  $\delta$  7.75-7.73 (m, 1H), 7.42- 7.40 (m, 1H), 7.31-7.29 (m, 3H), 7.11 (d,  $J$ = 7.8 Hz, 1H), 6.79 (dt,  $J$ = 1.2, 8.4 Hz, 1H), 3.86 (s, 3H), 2.71 (s, 2H), 1.25 (s, 6H).

$^{13}\text{C NMR}$  (151 MHz,  $\text{CDCl}_3$ )  $\delta$  158.71, 145.65, 135.19, 133.23, 129.41, 128.40, 128.10, 126.53, 124.33, 124.11, 112.66, 109.40, 55.40, 43.20, 34.33, 27.96.

**MS (GC-MS)**  $m/z$ : calculated for  $\text{C}_{17}\text{H}_{18}\text{O}$ : 238.14, found: 238.13.

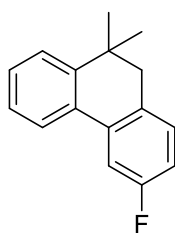

3-fluoro-9,9-dimethyl-9,10-dihydrophenanthrene (**3ad**): colorless solid (19.4 mg, 86%)

$^1\text{H NMR}$  (600 MHz,  $\text{CDCl}_3$ )  $\delta$  7.70-7.68 (m, 1H), 7.45-7.41 (m, 2H), 7.34-7.29 (m, 2H), 7.14(dd,  $J$ = 6.0, 8.4 Hz, 1H), 6.92 (dt,  $J$ = 2.4, 8.4 Hz, 1H), 2.73 (s, 2H), 1.25 (s, 6H).

$^{13}\text{C NMR}$  (151 MHz,  $\text{CDCl}_3$ )  $\delta$  162.21 (d,  $J$ = 239.6 Hz), 145.45, 135.99 (d,  $J$ = 7.5 Hz), 132.42 (d,  $J$ = 1.8 Hz), 131.51 (d,  $J$ = 2.6 Hz), 129.83 (d,  $J$ = 7.8 Hz), 128.59, 126.68, 124.31 (d,  $J$ = 26.1 Hz), 113.93 (d,  $J$ = 21.3 Hz), 110.34 (d,  $J$ = 22.2 Hz), 43.22, 34.24, 27.90.

**MS (GC-MS)**  $m/z$ : calculated for  $\text{C}_{16}\text{H}_{15}\text{F}$ : 222.12, found: 222.12.

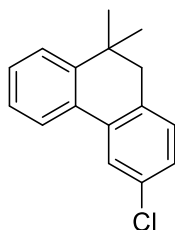

3-chloro-9,9-dimethyl-9,10-dihydrophenanthrene (**3ae**): brown solid (9.9 mg, 41%)

$^1\text{H NMR}$  (600 MHz,  $\text{CDCl}_3$ )  $\delta$  7.72-7.71 (m, 2H), 7.43-7.41 (m, 1H), 7.34-7.29 (m, 2H), 7.19 (dd,  $J$ = 2.4, 7.8 Hz, 1H), 7.13 (d,  $J$ = 8.4 Hz, 1H), 2.73 (s, 2H), 1.25 (s, 6H).

$^{13}\text{C NMR}$  (151 MHz,  $\text{CDCl}_3$ )  $\delta$  145.44, 135.92, 132.49, 132.11, 129.90, 128.63, 127.20, 126.71, 124.39, 124.18, 123.64, 43.37, 34.15, 27.89.

**MS (GC-MS)**  $m/z$ : calculated for  $\text{C}_{16}\text{H}_{15}\text{Cl}$ : 242.09, found: 242.09.

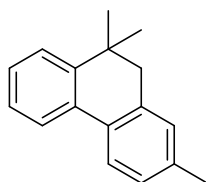

2,9,9-trimethyl-9,10-dihydrophenanthrene (**3af**): brown solid (15.5 mg, 70%)

**<sup>1</sup>H NMR (600 MHz, CDCl<sub>3</sub>)** δ 7.75-7.74 (m, 1H), 7.65 (d, J= 7.8 Hz, 1H), 7.41-7.39 (m, 1H), 7.30-7.27 (m, 2H), 7.11 (d, J= 7.8 Hz, 1H), 7.01 (s, 1H), 2.74 (s, 2H), 2.36 (s, 3H), 1.25 (s, 6H).

**<sup>13</sup>C NMR (151 MHz, CDCl<sub>3</sub>)** δ 145.11, 137.21, 135.92, 133.33, 131.44, 129.38, 127.56, 126.49, 124.21, 123.78, 123.42, 44.06, 34.19, 27.96, 21.23.

**MS (GC-MS) m/z**: calculated for C<sub>17</sub>H<sub>18</sub>: 222.14, found: 222.14.

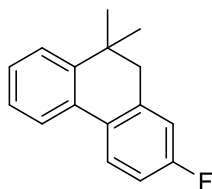

2-fluoro-9,9-dimethyl-9,10-dihydrophenanthrene (**3ag**): colorless oil (17.6 mg, 78%)

**<sup>1</sup>H NMR (600 MHz, CDCl<sub>3</sub>)** δ 7.71-7.69 (m, 2H), 7.41-7.40 (m, 1H), 7.30-7.27 (m, 2H), 6.98 (dt, J= 3.0, 9.0 Hz, 1H), 6.91 (dd, J= 3.0, 9.0 Hz, 1H), 2.75 (s, 2H), 1.25 (s, 6H).

**<sup>13</sup>C NMR (151 MHz, CDCl<sub>3</sub>)** δ 162.29 (d, J= 244.5 Hz), 144.81, 138.42 (d, J= 7.7 Hz), 132.53, 130.36 (d, J= 3.2 Hz), 127.85, 126.67, 125.20 (d, J= 8.3 Hz), 124.33, 123.86, 115.36 (d, J= 21.0 Hz), 113.61 (d, J= 21.3 Hz), 44.09, 34.16, 27.84.

**MS (GC-MS) m/z**: calculated for C<sub>16</sub>H<sub>15</sub>F: 222.12, found: 222.11.

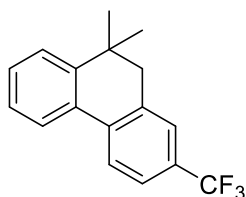

9,9-dimethyl-2-(trifluoromethyl)-9,10-dihydrophenanthrene (**3ah**): colorless oil (11.9 mg, 43%)

**<sup>1</sup>H NMR (600 MHz, CDCl<sub>3</sub>)** δ 7.84 (d, J= 8.4 Hz, 1H), 7.79 (dd, J= 1.2, 7.8 Hz, 1H), 7.55 (d, J= 7.8 Hz, 1H), 7.45-7.44 (m, 2H), 7.38-7.32 (m, 2H), 2.83 (s, 2H), 1.27 (s, 6H).

**<sup>13</sup>C NMR (151 MHz, CDCl<sub>3</sub>)** δ 145.83, 137.65, 137.64, 136.57, 131.93, 129.09, 126.78, 125.38 (q, J= 3.8 Hz), 124.58, 124.47, 124.37 (q, J= 270.3 Hz), 123.77 (q, J= 3.8 Hz), 123.71, 43.80, 34.09, 27.90.

**MS (GC-MS) m/z**: calculated for C<sub>17</sub>H<sub>15</sub>F<sub>3</sub>: 276.11, found: 276.11.

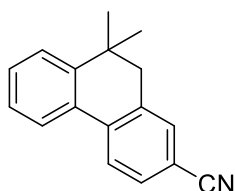

9,9-dimethyl-9,10-dihydrophenanthrene-2-carbonitrile (**3ai**): yellow oil (8.4 mg, 36%)

**<sup>1</sup>H NMR (600 MHz, CDCl<sub>3</sub>)** δ 8.02 (d, J= 0.6 Hz, 1H), 7.73 (dd, J= 1.2, 7.2 Hz, 1H), 7.51 (dd, J= 1.2, 7.2 Hz, 1H), 7.45-7.44 (m, 1H), 7.39-7.33 (m, 2H), 7.30 (d, J= 7.8 Hz, 1H), 2.83 (s, 2H), 1.26 (s, 6H).

**<sup>13</sup>C NMR (151 MHz, CDCl<sub>3</sub>)** δ 145.37, 141.46, 135.53, 131.14, 130.73, 129.49, 129.29, 127.14, 127.00, 124.52, 124.26, 119.33, 110.82, 44.08, 34.03, 27.88.



**HRMS (ESI-TOF)  $m/z$ :** calculated for  $C_{17}H_{16}N^+$ : 234.1282 ( $M + H$ )<sup>+</sup>, found: 234.1290.

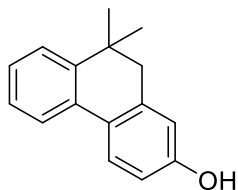

9,9-dimethyl-9,10-dihydrophenanthren-2-ol (**3aj**): colorless oil (11.2 mg, 50%)

**<sup>1</sup>H NMR (600 MHz, CDCl<sub>3</sub>)**  $\delta$  7.68 (dd,  $J = 1.2, 7.2$  Hz, 1H), 7.63 (d,  $J = 8.4$  Hz, 1H), 7.39 (dd,  $J = 1.2, 7.2$  Hz, 1H), 7.28-7.23 (m, 2H), 6.77 (dd,  $J = 3.0, 8.4$  Hz, 1H), 6.68 (d,  $J = 3.0$  Hz, 1H), 4.92 (s, 1H), 2.71 (s, 2H), 1.25 (s, 6H).

**<sup>13</sup>C NMR (151 MHz, CDCl<sub>3</sub>)**  $\delta$  155.05, 144.47, 138.02, 133.12, 127.33, 127.11, 126.54, 125.03, 124.21, 123.38, 115.42, 113.70, 44.21, 34.19, 27.89.

**HRMS (ESI-TOF)  $m/z$ :** calculated for  $C_{16}H_{17}O^+$ : 225.1279 ( $M + H$ )<sup>+</sup>, found: 225.1273.

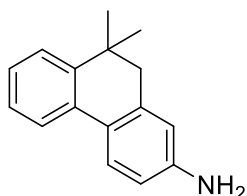

9,9-dimethyl-9,10-dihydrophenanthren-2-amine (**3ak**): yellow oil (14.9 mg, 67%)

**<sup>1</sup>H NMR (600 MHz, CDCl<sub>3</sub>)**  $\delta$  7.66 (d,  $J = 7.8$  Hz, 1H), 7.55 (d,  $J = 7.8$  Hz, 1H), 7.37 (d,  $J = 7.8$  Hz, 1H), 7.24 (t,  $J = 7.2$  Hz, 1H), 7.20 (t,  $J = 7.2$  Hz, 1H), 6.62 (dd,  $J = 3.0, 8.4$  Hz, 1H), 6.52 (d,  $J = 1.8$  Hz, 1H), 3.69 (s, 2H), 2.67 (s, 2H), 1.24 (s, 6H).

**<sup>13</sup>C NMR (151 MHz, CDCl<sub>3</sub>)**  $\delta$  145.89, 144.19, 137.49, 133.61, 126.51, 126.45, 125.20, 124.76, 124.12, 122.97, 115.16, 113.58, 44.32, 34.21, 27.94.

**HRMS (ESI-TOF)  $m/z$ :** calculated for  $C_{16}H_{18}N^+$ : 224.1439 ( $M + H$ )<sup>+</sup>, found: 224.1432.

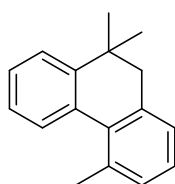

4,9,9-trimethyl-9,10-dihydrophenanthrene (**3al**): colorless oil (8.9 mg, 40%)

**<sup>1</sup>H NMR (600 MHz, CDCl<sub>3</sub>)**  $\delta$  7.68-7.66 (m, 1H), 7.42-7.41 (m, 1H), 7.29-7.27 (m, 2H), 7.18 (d,  $J = 7.2$  Hz, 1H), 7.13 (t,  $J = 7.2$  Hz, 1H), 7.06 (d,  $J = 7.2$  Hz, 1H), 2.68 (s, 2H), 2.63 (s, 3H), 1.21 (s, 6H).

**<sup>13</sup>C NMR (151 MHz, CDCl<sub>3</sub>)**  $\delta$  147.21, 137.87, 134.07, 134.06, 133.75, 130.60, 128.52, 127.12, 126.70, 126.24, 125.19, 123.67, 45.44, 34.15, 27.21, 23.18.

**MS (GC-MS)  $m/z$ :** calculated for  $C_{17}H_{18}$ : 222.14, found: 222.13.

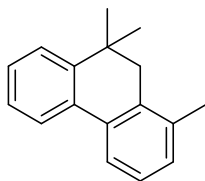

1,9,9-trimethyl-9,10-dihydrophenanthrene (**3am**): colorless oil (14.2 mg, 64%)

**<sup>1</sup>H NMR (600 MHz, CDCl<sub>3</sub>)** δ 7.76-7.75 (m, 1H), 7.63 (d, J= 7.8 Hz, 1H), 7.42-7.40 (m, 1H), 7.29-7.28 (m, 2H), 7.20 (t, J= 7.2 Hz, 1H), 7.12 (d, J= 7.8 Hz, 1H), 2.73 (s, 2H), 2.34 (s, 3H), 1.26 (s, 6H).

**<sup>13</sup>C NMR (151 MHz, CDCl<sub>3</sub>)** δ 145.09, 135.66, 134.48, 134.15, 133.69, 129.30, 127.74, 126.49, 126.13, 124.46, 123.99, 121.54, 39.88, 33.93, 28.11, 19.81.

**MS (GC-MS) *m/z***: calculated for C<sub>17</sub>H<sub>18</sub>: 222.14, found: 222.14.

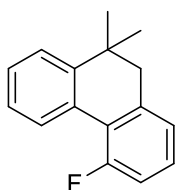

4-fluoro-9,9-dimethyl-9,10-dihydrophenanthrene (**3an**): colorless oil (14.7 mg, 65%)

**<sup>1</sup>H NMR (600 MHz, CDCl<sub>3</sub>)** δ 8.07 (dt, J= 1.2, 6.6 Hz, 1H), 7.44-7.42 (m, 1H), 7.32-7.28 (m, 2H), 7.19-7.15 (m, 1H), 7.04-6.99 (m, 2H), 2.75 (s, 2H), 1.25 (s, 6H).

**<sup>13</sup>C NMR (151 MHz, CDCl<sub>3</sub>)** δ 160.15 (d, J= 248.9 Hz), 145.83, 139.38 (d, J= 3.5 Hz), 139.54 (d, J= 3.6 Hz), 128.38, 128.27, 128.16, 128.09, 126.29, 124.26 (d, J= 2.9 Hz), 123.93, 121.98 (d, J= 9.0 Hz), 114.85 (d, J= 24.3 Hz), 44.31, 34.19, 27.63.

**MS (GC-MS) *m/z***: calculated for C<sub>16</sub>H<sub>15</sub>F: 222.12, found: 222.12.

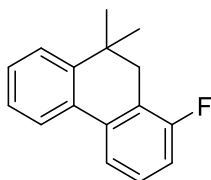

1-fluoro-9,9-dimethyl-9,10-dihydrophenanthrene (**3ao**): colorless oil (6.8 mg, 30%)

**<sup>1</sup>H NMR (600 MHz, CDCl<sub>3</sub>)** δ 7.76 (dd, J= 1.2, 7.2 Hz, 1H), 7.56 (d, J= 7.8 Hz, 1H), 7.43 (dd, J= 1.8, 7.8 Hz, 1H), 7.34-7.29 (m, 2H), 7.27-7.23 (m, 1H), 6.99 (t, J= 9.0 Hz, 1H), 2.80 (s, 2H), 1.28 (s, 6H).

**<sup>13</sup>C NMR (151 MHz, CDCl<sub>3</sub>)** δ 160.64 (d, J= 240.9 Hz), 145.23, 136.56 (d, J= 5.1 Hz), 132.38 (d, J= 3.2 Hz), 128.47, 127.30 (d, J= 8.4 Hz), 126.59, 124.42, 124.36, 122.72 (d, J= 17.6 Hz), 119.11 (d, J= 3.0 Hz), 114.01 (d, J= 22.5 Hz), 34.98 (d, J= 2.9 Hz), 33.48, 28.04.

**MS (GC-MS) *m/z***: calculated for C<sub>16</sub>H<sub>15</sub>F: 222.12, found: 222.12.

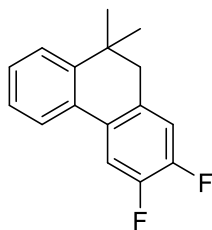

1-fluoro-9,9-dimethyl-9,10-dihydrophenanthrene (**3ap**): colorless oil (14.2 mg, 58%)

**<sup>1</sup>H NMR (600 MHz, CDCl<sub>3</sub>)** δ 7.62-7.61 (m, 1H), 7.53 (dd, J= 7.8, 11.4 Hz, 1H), 7.42-7.41 (m, 1H), 7.33-7.28 (m, 2H), 6.99 (dd, J= 8.4, 10.8 Hz, 1H), 2.71 (s, 2H), 1.25 (s, 6H).

**<sup>13</sup>C NMR (151 MHz, CDCl<sub>3</sub>)** δ 150.27 (dd, J= 3.2, 203.6 Hz), 148.63 (d, J= 12.6 Hz), 144.87, 132.59 (dd, J= 3.6, 5.7 Hz), 131.65, 130.96 (dd, J= 3.9, 5.7 Hz), 128.45, 126.79, 124.43, 124.01, 117.18 (d, J= 16.8 Hz), 112.51 (d, J= 18.2 Hz), 43.18, 34.16, 27.80.

**MS (GC-MS) *m/z***: calculated for C<sub>16</sub>H<sub>14</sub>F<sub>2</sub>: 244.11, found: 244.11.

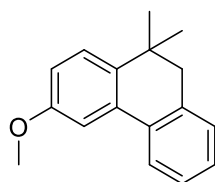

3-methoxy-10,10-dimethyl-9,10-dihydrophenanthrene (**3ba**): colorless oil (13.8 mg, 58%)

**<sup>1</sup>H NMR (600 MHz, CDCl<sub>3</sub>)** δ 7.72 (d, J= 7.2 Hz, 1H), 7.34-7.29 (m, 3H), 7.23 (t, J= 7.2 Hz, 1H), 7.19 (d, J= 7.2 Hz, 1H), 6.85 (dd, J= 3.0, 9.0 Hz, 1H), 3.86 (s, 3H), 2.76 (s, 2H), 1.23 (s, 6H).

**<sup>13</sup>C NMR (151 MHz, CDCl<sub>3</sub>)** δ 158.30, 137.95, 136.44, 134.47, 134.07, 128.69, 127.57, 126.81, 125.34, 123.54, 113.02, 109.73, 55.37, 44.35, 33.67, 28.12.

**HRMS (ESI-TOF) *m/z***: calculated for C<sub>17</sub>H<sub>19</sub>O<sup>+</sup>: 239.1463 (M + H)<sup>+</sup>, found: 239.1458.

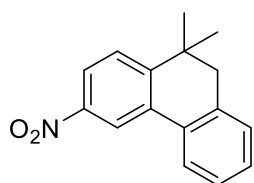

10,10-dimethyl-3-nitro-9,10-dihydrophenanthrene (**3ca**): brown oil (9.6 mg, 38%)

**<sup>1</sup>H NMR (600 MHz, CDCl<sub>3</sub>)** δ 8.61 (d, J= 8.6 Hz, 1H), 8.13 (dd, J= 2.4, 8.4 Hz, 1H), 7.84 (d, J= 7.8 Hz, 1H), 7.56 (d, J= 8.4 Hz, 1H), 7.38 (dt, J= 0.6, 7.2 Hz, 1H), 7.32 (dt, J= 1.2, 7.8 Hz), 7.24 (d, J= 7.2 Hz, 1H), 2.82 (s, 2H), 1.30 (s, 6H).

**<sup>13</sup>C NMR (151 MHz, CDCl<sub>3</sub>)** δ 152.57, 135.85, 134.96, 132.22, 128.90, 128.85, 127.39, 125.45, 123.94, 122.48, 119.01, 43.27, 34.87, 27.60.

**HRMS (ESI-TOF) *m/z***: calculated for C<sub>16</sub>H<sub>15</sub>NO<sub>2</sub>Na<sup>+</sup>: 276.1001 (M + Na)<sup>+</sup>, found: 276.1008.

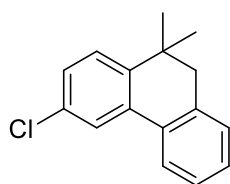

3-chloro-10,10-dimethyl-9,10-dihydrophenanthrene (**3da**): yellow oil (17.0 mg, 70%)

$^1\text{H NMR}$  (600 MHz,  $\text{CDCl}_3$ )  $\delta$  7.73 (d,  $J$  = 2.4 Hz, 1H), 7.70 (d,  $J$  = 7.8 Hz, 1H), 7.34-7.30 (m, 2H), 7.27-7.23 (m, 2H), 7.20 (d,  $J$  = 7.2 Hz, 1H), 2.76 (s, 2H), 1.23 (s, 6H).

$^{13}\text{C NMR}$  (151 MHz,  $\text{CDCl}_3$ )  $\delta$  143.81, 136.15, 135.15, 133.05, 132.41, 128.77, 128.11, 127.61, 127.03, 125.86, 124.07, 123.62, 43.85, 34.00, 27.83.

**MS (GC-MS)  $m/z$** : calculated for  $\text{C}_{16}\text{H}_{15}\text{Cl}$ : 242.09, found: 242.08.

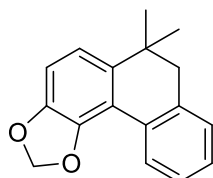

6,6-dimethyl-6,7-dihydrophenanthro[3,4-d][1,3]dioxole (**3ea**): colorless solid (8.3 mg, 33%)

$^1\text{H NMR}$  (600 MHz,  $\text{CDCl}_3$ )  $\delta$  8.15 (d,  $J$  = 7.8 Hz, 1H), 7.29 (dt,  $J$  = 1.2, 7.8 Hz, 1H), 7.23 (dt,  $J$  = 1.2, 7.8 Hz, 1H), 7.19 (d,  $J$  = 7.2 Hz, 1H), 6.89 (d,  $J$  = 8.4 Hz, 1H), 6.75 (d,  $J$  = 7.8 Hz, 1H), 6.04 (s, 2H), 2.76 (s, 2H), 1.22 (s, 6H).

$^{13}\text{C NMR}$  (151 MHz,  $\text{CDCl}_3$ )  $\delta$  146.25, 144.47, 139.87, 136.18, 131.13, 128.12, 127.45, 126.78, 126.52, 117.05, 116.84, 107.17, 100.76, 44.53, 34.18, 28.35.

**HRMS (ESI-TOF)  $m/z$** : calculated for  $\text{C}_{16}\text{H}_{17}\text{O}_2^+$ : 253.1228(M + H) $^+$ , found: 253.1223.

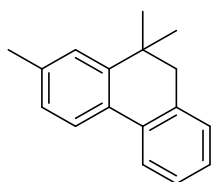

2,10,10-trimethyl-9,10-dihydrophenanthrene (**3fa**): colorless oil (15.1 mg, 68%)

$^1\text{H NMR}$  (600 MHz,  $\text{CDCl}_3$ )  $\delta$  7.72 (d,  $J$  = 7.8 Hz, 1H), 7.67 (d,  $J$  = 7.8 Hz, 1H), 7.29 (t,  $J$  = 7.2 Hz, 1H), 7.22-7.17 (m, 3H), 7.11 (d,  $J$  = 8.4 Hz, 1H), 2.76 (s, 2H), 2.39 (s, 3H), 1.25 (s, 6H).

$^{13}\text{C NMR}$  (151 MHz,  $\text{CDCl}_3$ )  $\delta$  145.33, 137.65, 135.73, 134.24, 130.50, 128.57, 127.25, 127.01, 126.77, 124.98, 124.04, 123.19, 44.17, 34.09, 27.96, 21.54.

**MS (GC-MS)  $m/z$** : calculated for  $\text{C}_{17}\text{H}_{18}$ : 222.14, found: 222.14.

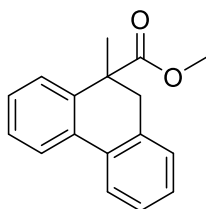

methyl 9-methyl-9,10-dihydrophenanthrene-9-carboxylate (**3ga**): colorless oil (18.6 mg, 74%)

$^1\text{H NMR}$  (600 MHz,  $\text{CDCl}_3$ )  $\delta$  7.79 (d,  $J$  = 7.8 Hz, 1H), 7.73 (d,  $J$  = 7.8 Hz, 1H), 7.38-7.35 (m, 1H), 7.32-7.30 (m, 3H), 7.24-7.22 (m, 2H), 2.61 (s, 3H), 3.48 (d,  $J$  = 15.0 Hz, 1H), 2.84 (d,  $J$  = 15.0 Hz, 1H), 1.55 (s, 3H).

$^{13}\text{C NMR}$  (151 MHz,  $\text{CDCl}_3$ )  $\delta$  176.46, 139.11, 134.48, 133.53, 133.49, 128.47, 127.82, 127.74, 127.27, 126.00, 124.16, 123.73, 52.35, 46.96, 39.97, 23.67.

**HRMS (ESI-TOF)  $m/z$** : calculated for  $\text{C}_{17}\text{H}_{17}\text{O}_2^+$ : 253.1228(M + H) $^+$ , found: 253.1223.

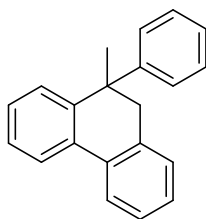

9-methyl-9-phenyl-9,10-dihydrophenanthrene (**3ha**): white solid (8.6 mg, 32%)

**<sup>1</sup>H NMR (600 MHz, CDCl<sub>3</sub>)** δ 7.82 (d, J= 7.2 Hz, 1H), 7.71 (d, J= 7.8 Hz, 1H), 7.34 (dt, J= 1.2, 7.8 Hz, 1H), 7.28-7.10 (m, 10H), 3.44 (d, J= 15.0 Hz, 1H), 2.99 (d, J= 15.0 Hz, 1H), 1.66 (s, 3H).

**<sup>13</sup>C NMR (151 MHz, CDCl<sub>3</sub>)** δ 147.62, 144.14, 135.51, 134.13, 134.08, 128.37, 127.89, 127.71, 127.55, 127.18, 127.16, 1286.98, 126.93, 125.89, 124.09, 123.51, 44.45, 42.86, 27.58.

**HRMS (ESI-TOF) m/z**: calculated for C<sub>21</sub>H<sub>18</sub>Na<sup>+</sup>: 293.1307 (M + Na)<sup>+</sup>, found: 293.1319.

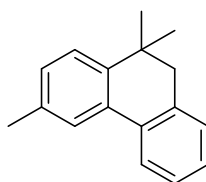

3,10,10-trimethyl-9,10-dihydrophenanthrene (**3ka**): colorless oil (12.4 mg, 56%)

**<sup>1</sup>H NMR (600 MHz, CDCl<sub>3</sub>)** δ 7.75 (d, J= 7.8 Hz, 1H), 7.60 (s, 1H), 7.32-7.28 (m, 2H), 7.22 (t, J= 7.8 Hz, 1H), 7.18 (d, J= 7.2 Hz, 1H), 7.12 (d, J= 7.8 Hz, 1H), 2.76 (s, 2H), 2.40 (s, 3H), 1.24 (s, 6H).

**<sup>13</sup>C NMR (151 MHz, CDCl<sub>3</sub>)** δ 142.59, 136.18, 135.93, 134.22, 133.11, 128.66, 128.64, 127.32, 126.78, 124.80, 124.22, 123.46, 44.23, 33.86, 28.01, 21.25.

**MS (GC-MS) m/z**: calculated for C<sub>17</sub>H<sub>18</sub>: 222.14, found: 222.14.

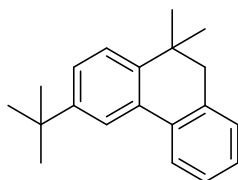

3-(tert-butyl)-10,10-dimethyl-9,10-dihydrophenanthrene (**3la**): colorless oil (21.4 mg, 81%)

**<sup>1</sup>H NMR (600 MHz, CDCl<sub>3</sub>)** δ 7.79 (d, J= 1.2 Hz, 1H), 7.78 (d, J= 7.8 Hz, 1H), 7.35- 7.30 (m, 3H), 7.22 (t, J= 7.2 Hz, 1H), 7.19 (d, J= 7.2 Hz, 1H), 2.76 (s, 2H), 1.38 (s, 9H), 1.25 (s, 6H).

**<sup>13</sup>C NMR (151 MHz, CDCl<sub>3</sub>)** δ 149.09, 142.50, 136.24, 134.65, 132.72, 128.67, 127.24, 126.77, 124.97, 123.93, 123.41, 121.06, 44.22, 34.58, 33.82, 31.47, 27.97.

**HRMS (ESI-TOF) m/z**: calculated for C<sub>20</sub>H<sub>24</sub>Na<sup>+</sup>: 287.1776 (M + Na)<sup>+</sup>, found: 287.1766.

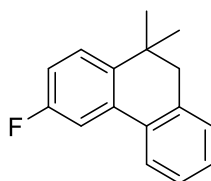

3-fluoro-10,10-dimethyl-9,10-dihydrophenanthrene (**3na**): colorless oil (19.9 mg, 88%)

**<sup>1</sup>H NMR (600 MHz, CDCl<sub>3</sub>)** δ 7.67 (d, J= 7.8 Hz, 1H), 7.44 (dd, J= 2.4, 10.2 Hz, 1H), 7.35 (dd, J= 5.4, 8.4 Hz, 1H), 7.31 (t, J= 7.2 Hz, 1H), 7.26 (dt, J= 1.2, 7.8 Hz, 1H), 7.20 (d, J= 7.2 Hz, 1H), 6.96 (dt, J= 2.4, 10.8 Hz, 1H), 2.77 (s, 2H), 1.24 (s, 6H).

**<sup>13</sup>C NMR (151 MHz, CDCl<sub>3</sub>)** δ 161.88 (d, J= 241.4 Hz), 141.07 (d, J= 2.9 Hz), 136.26, 135.35 (d, J= 7.5 Hz), 128.75, 128.06, 126.99, 125.90 (d, J= 8.0 Hz), 123.65, 114.24 (d, J= 20.9 Hz), 110.68 (d, J= 22.1 Hz), 44.05, 33.92, 28.03.

**MS (GC-MS) m/z:** calculated for C<sub>16</sub>H<sub>15</sub>F: 222.12, found: 222.11.

## 8 References

[1] Z. Wu, D. Ma, B. Zhou, X.-M. Ji, X.-T. Ma, X.-L. Wang and Y.-H. Zhang, *Angew. Chem. Int. Ed.*, 2017, **129**, 12456.

[2] F. Qu, J. R. Khusnutdinova, N. P. Rath and L. M. Mirica, *Chem. Commun.*, 2014, **50**, 3036.

## 9 NMR Spectra

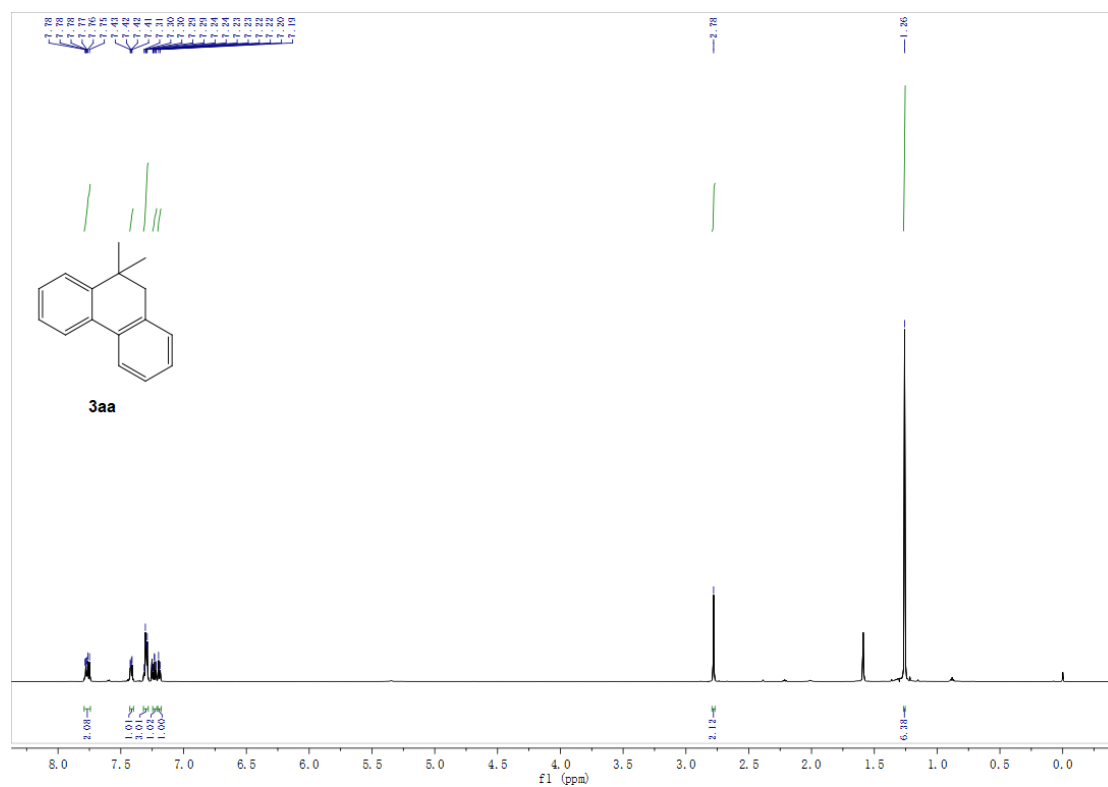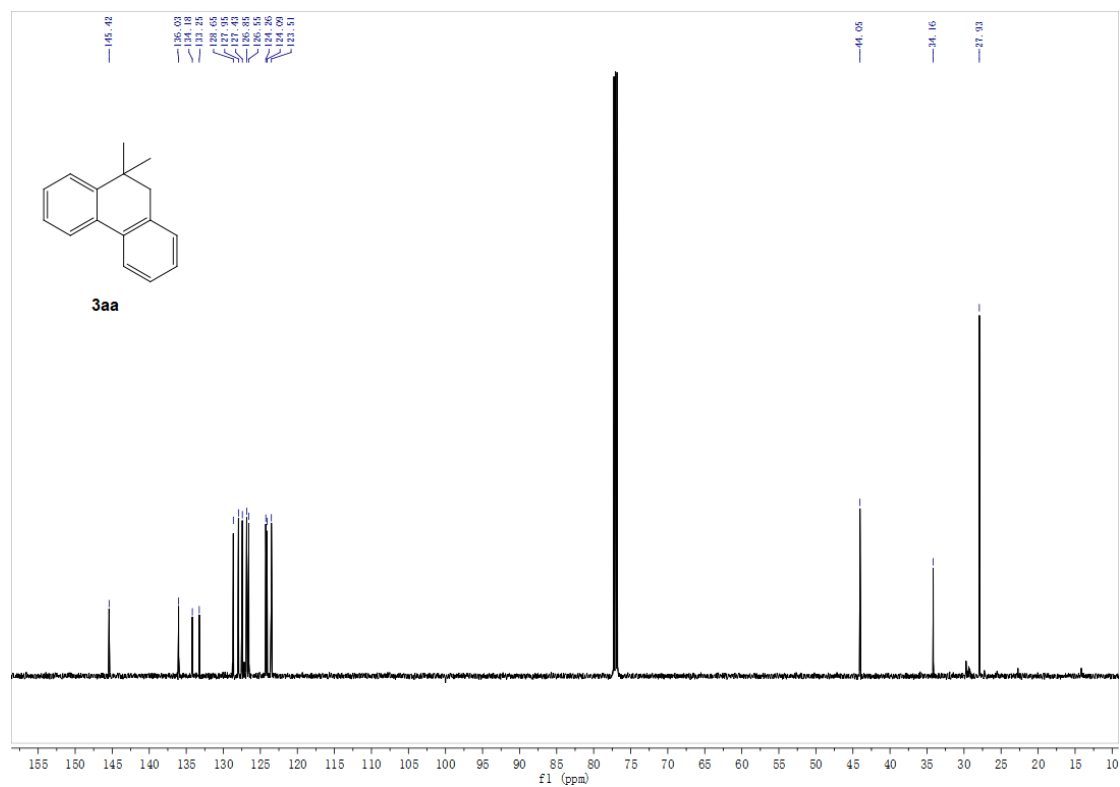

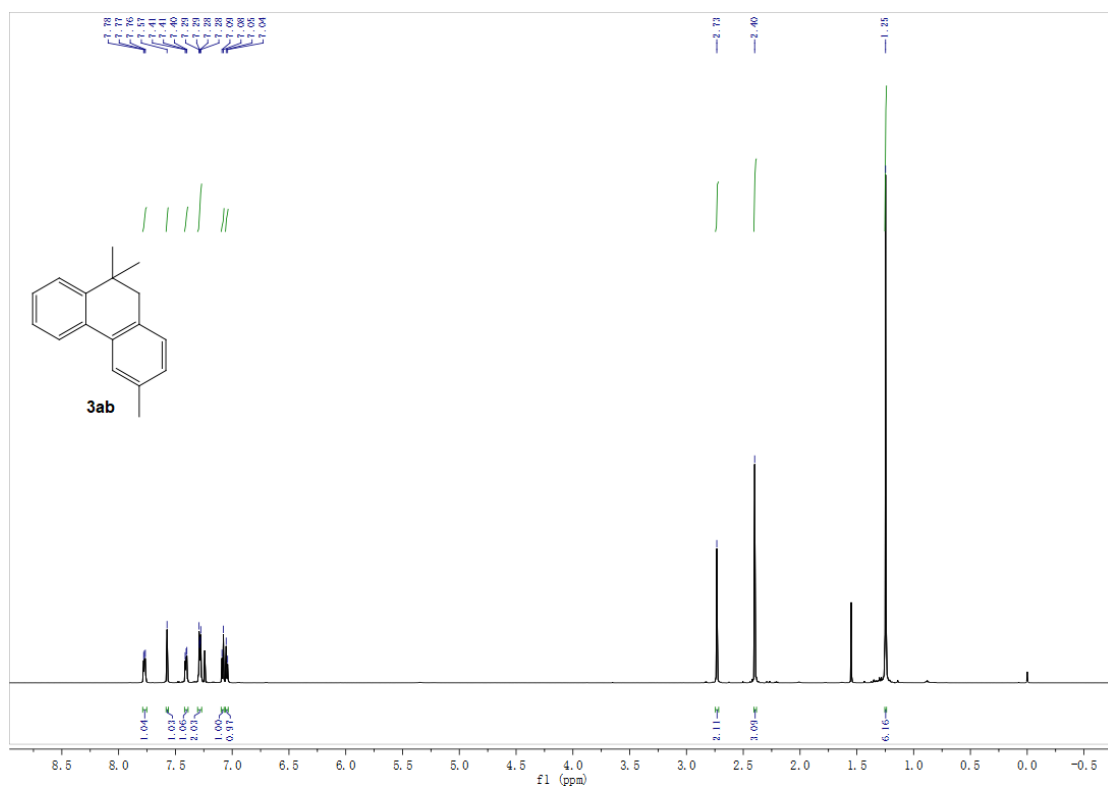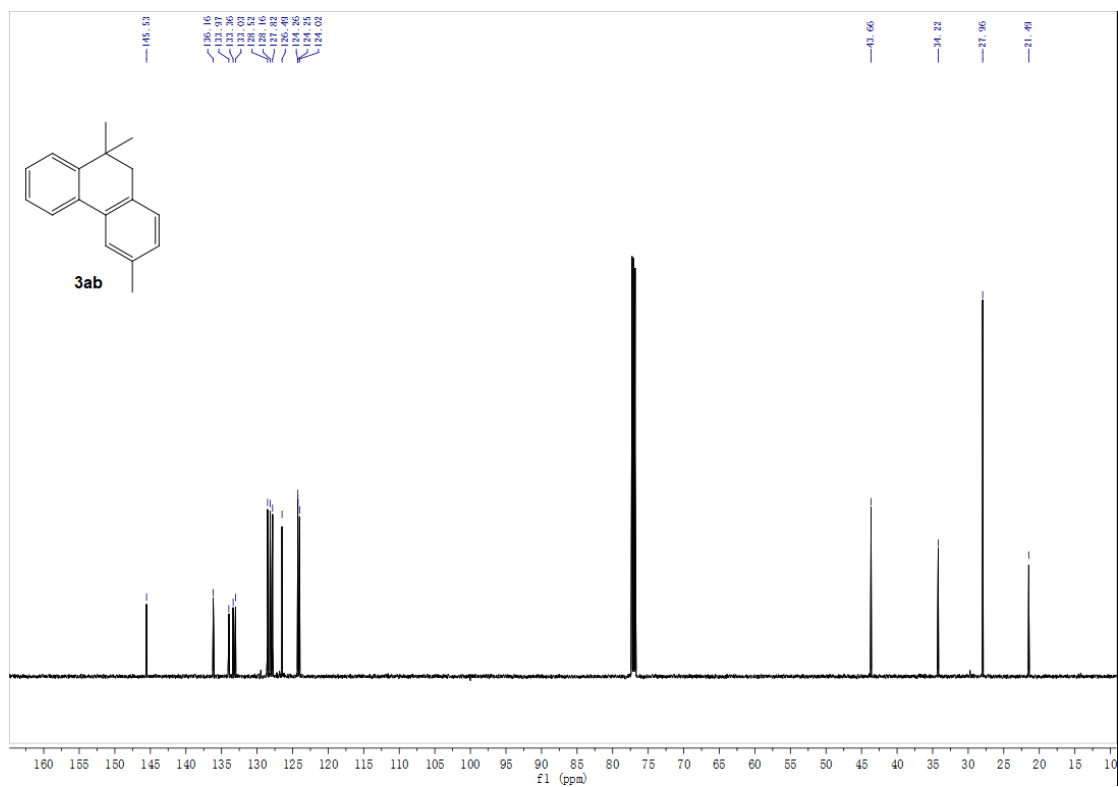



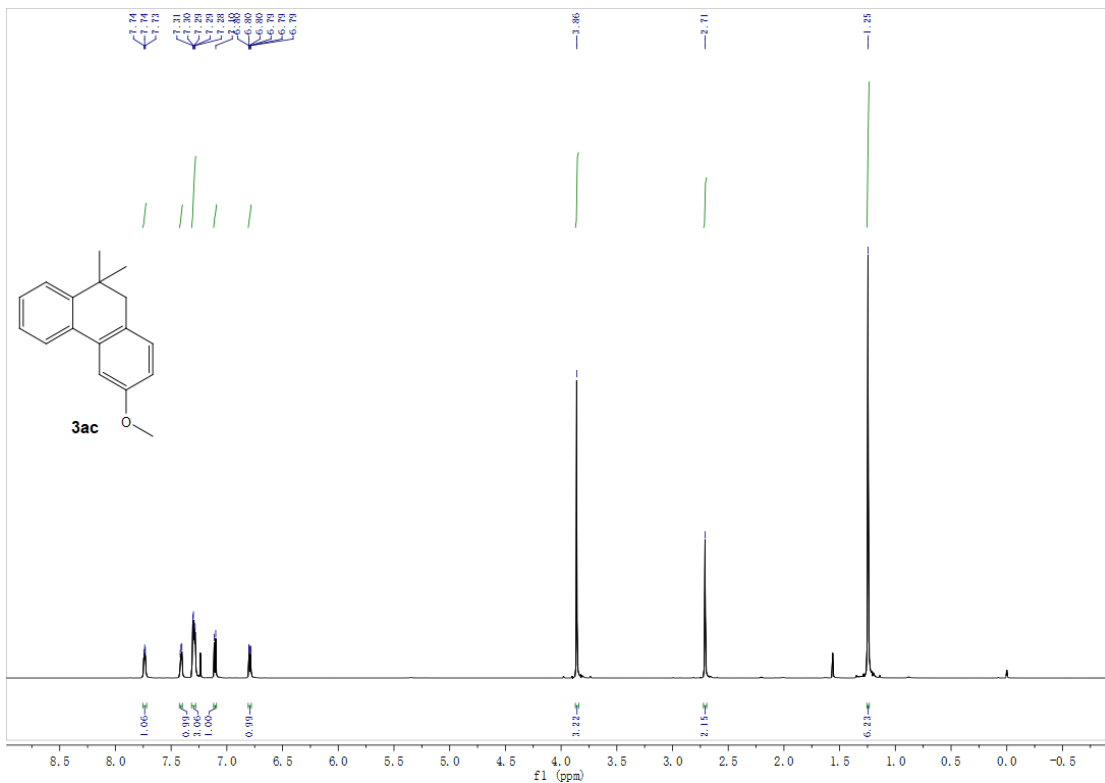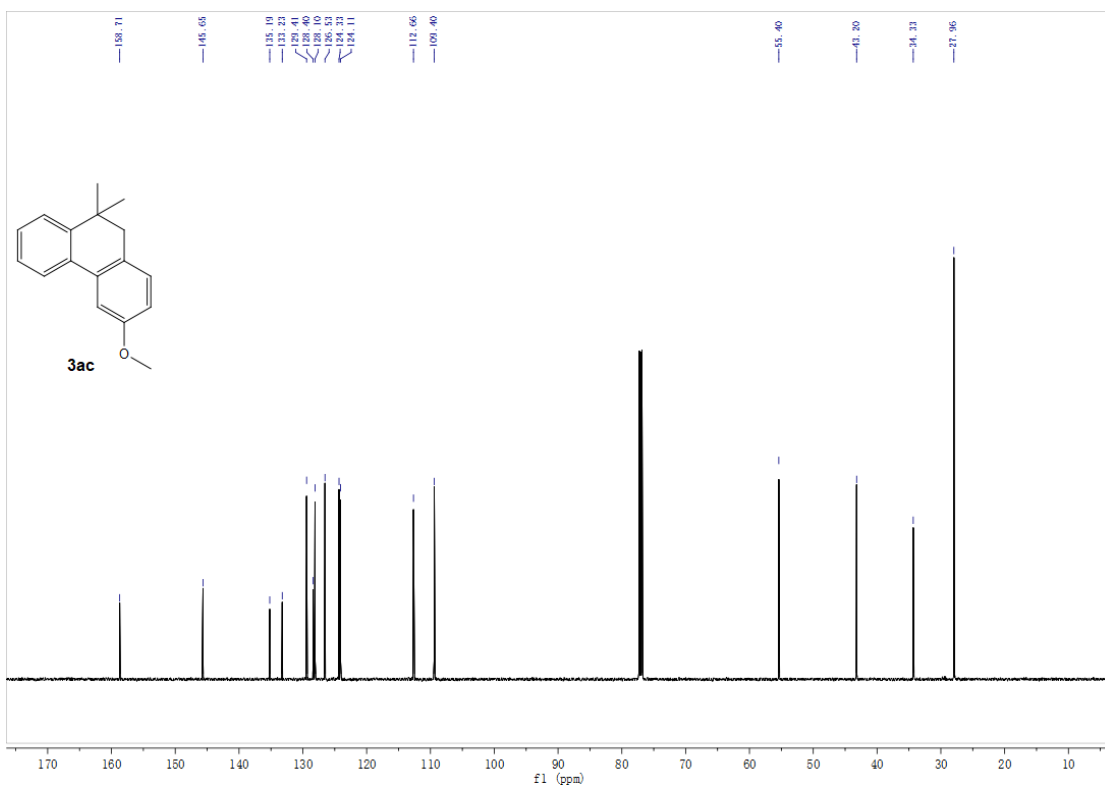

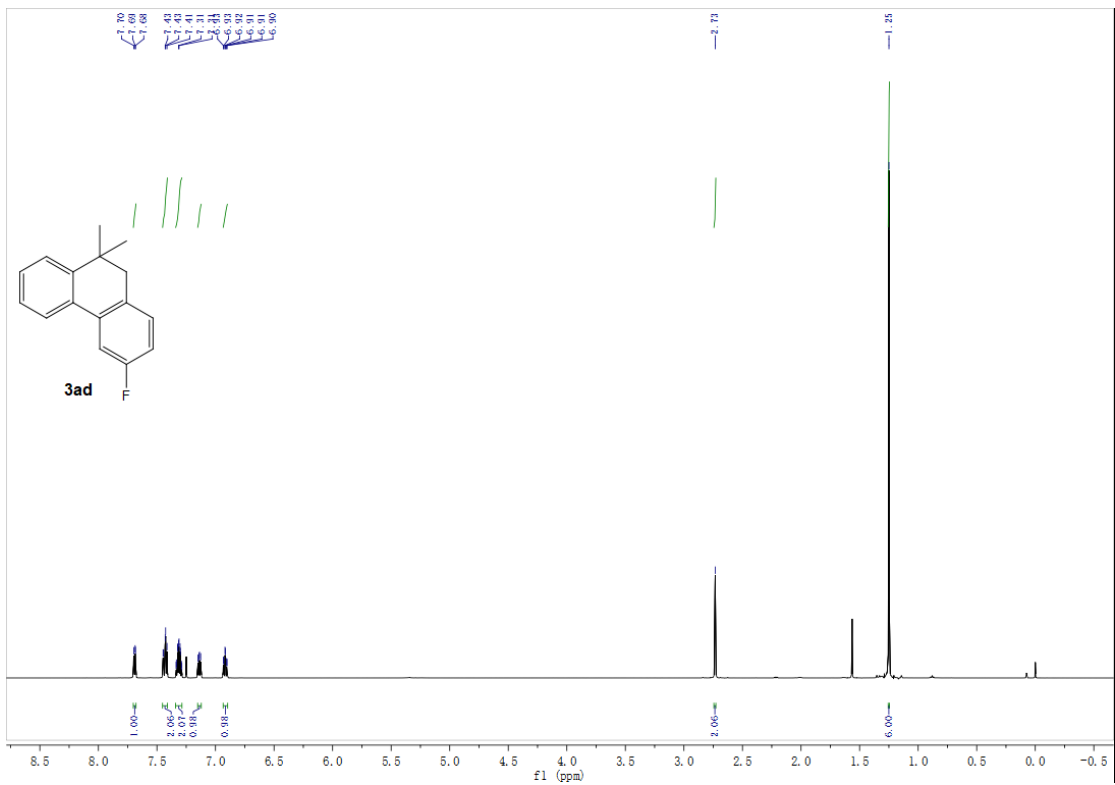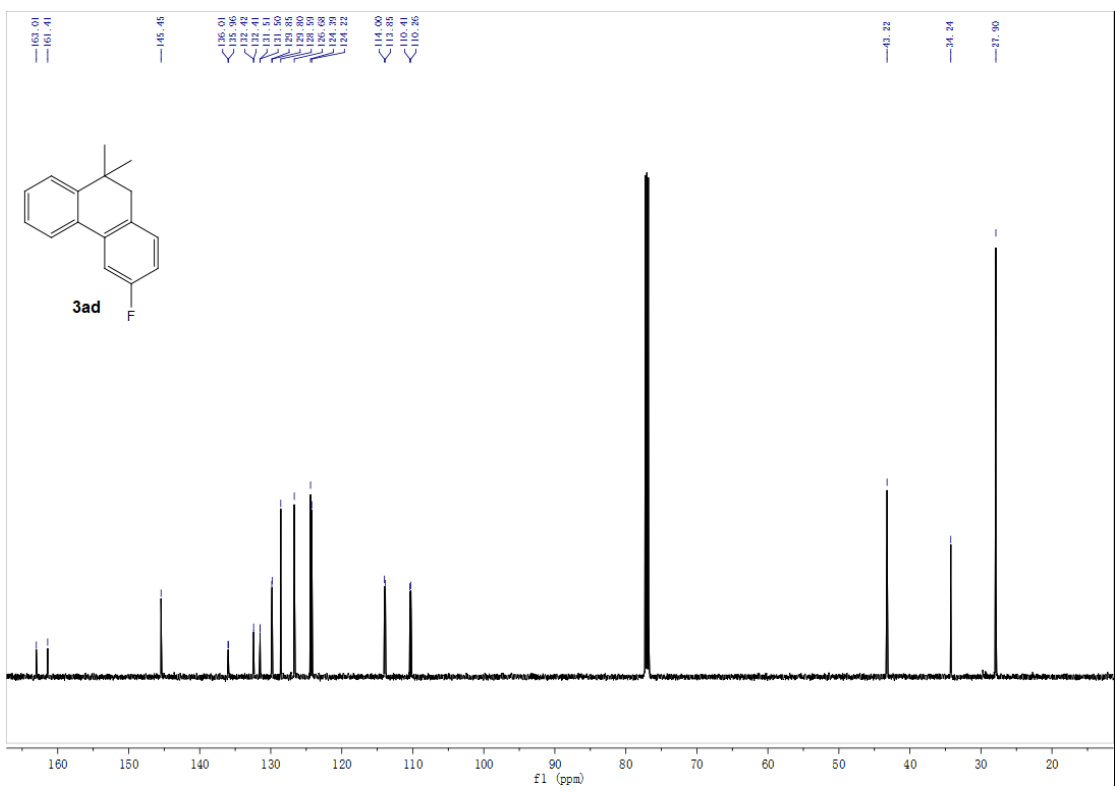

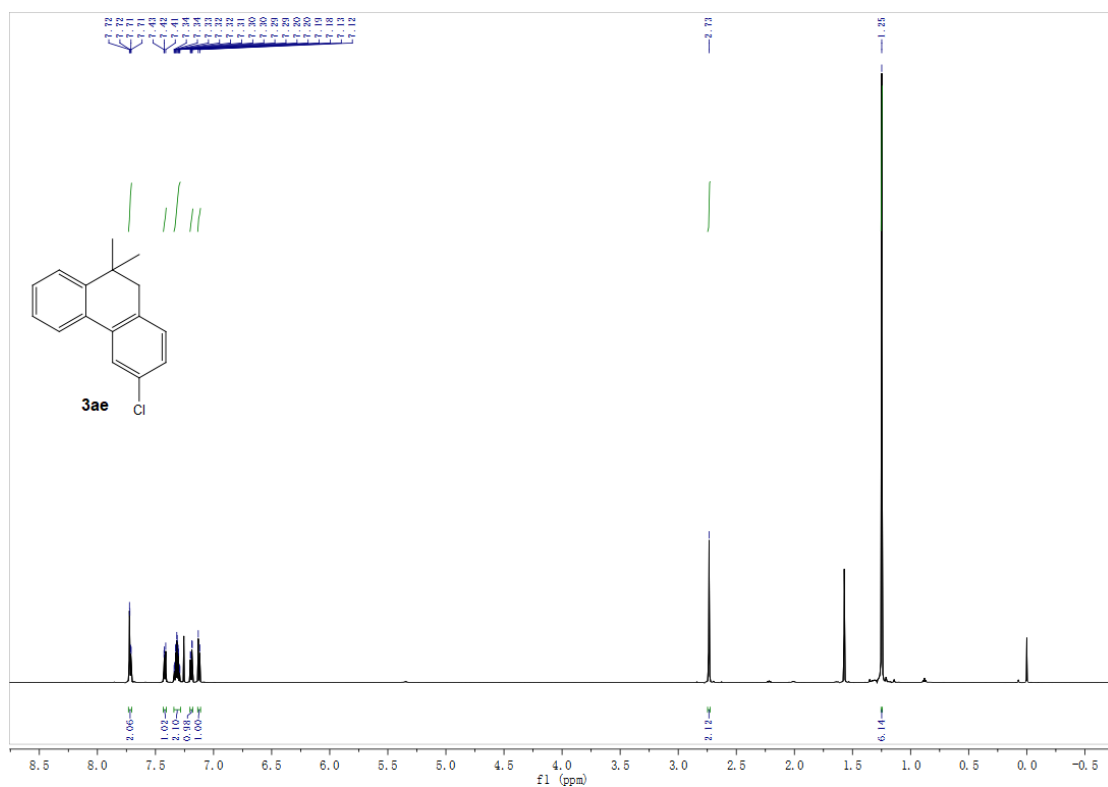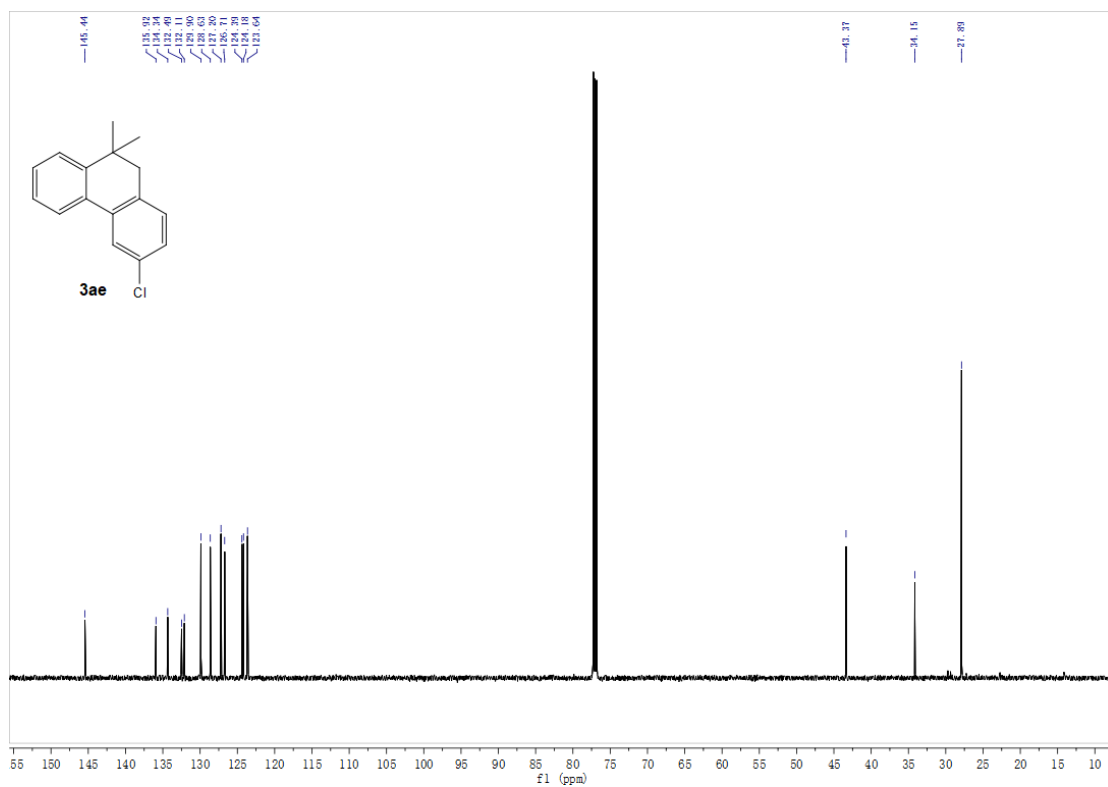

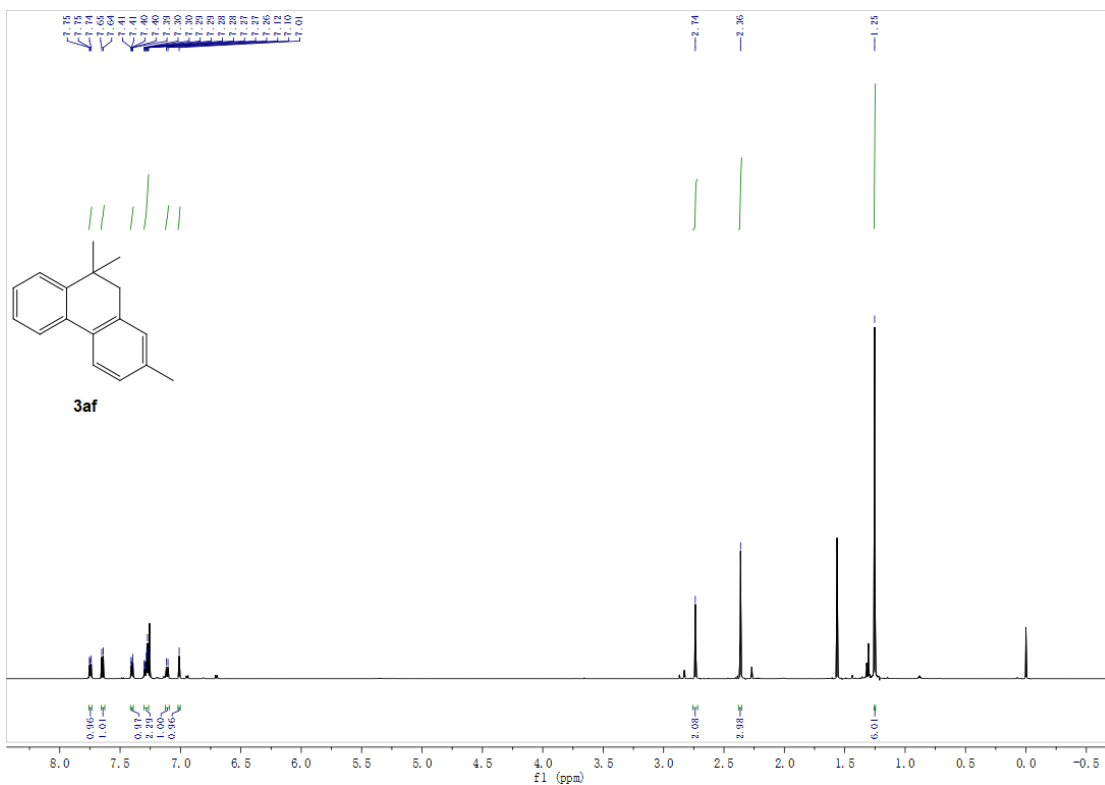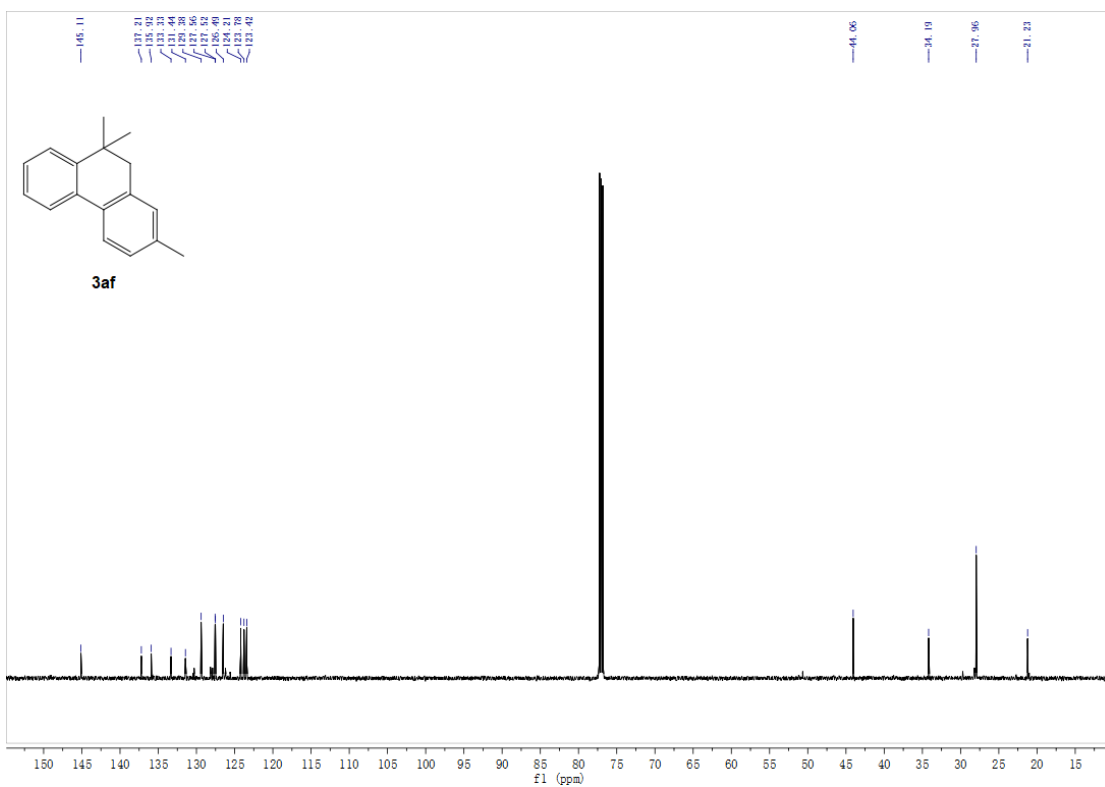

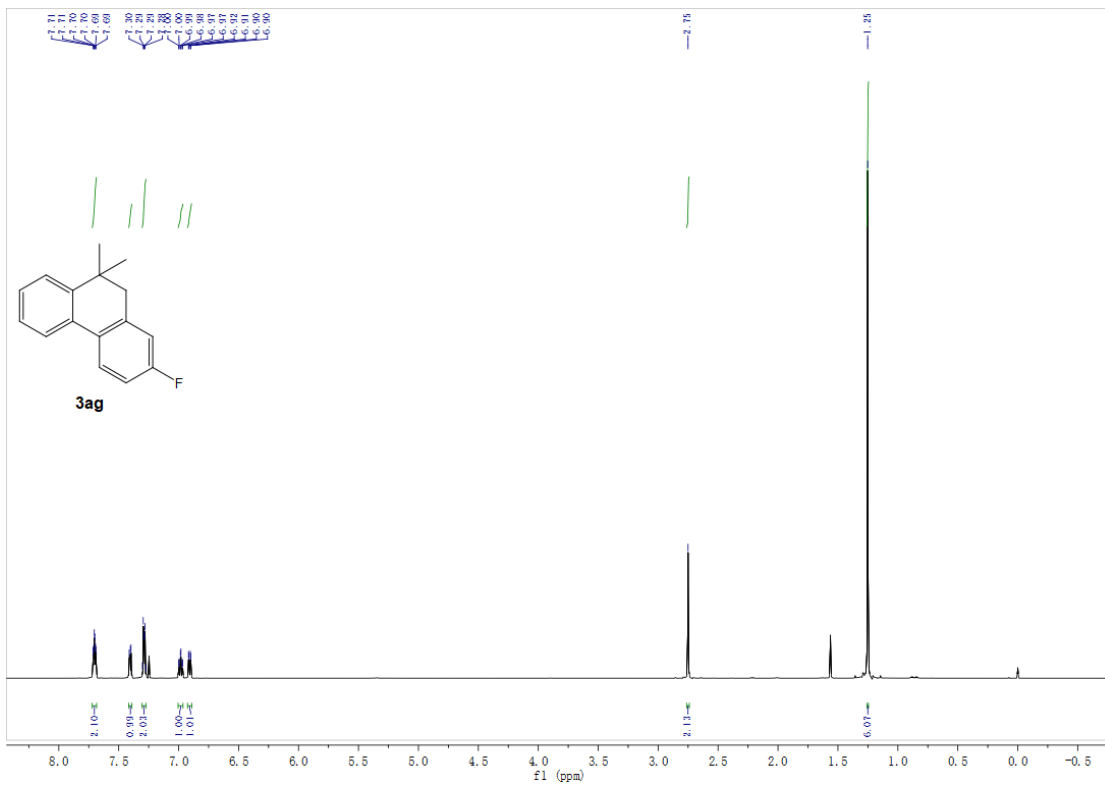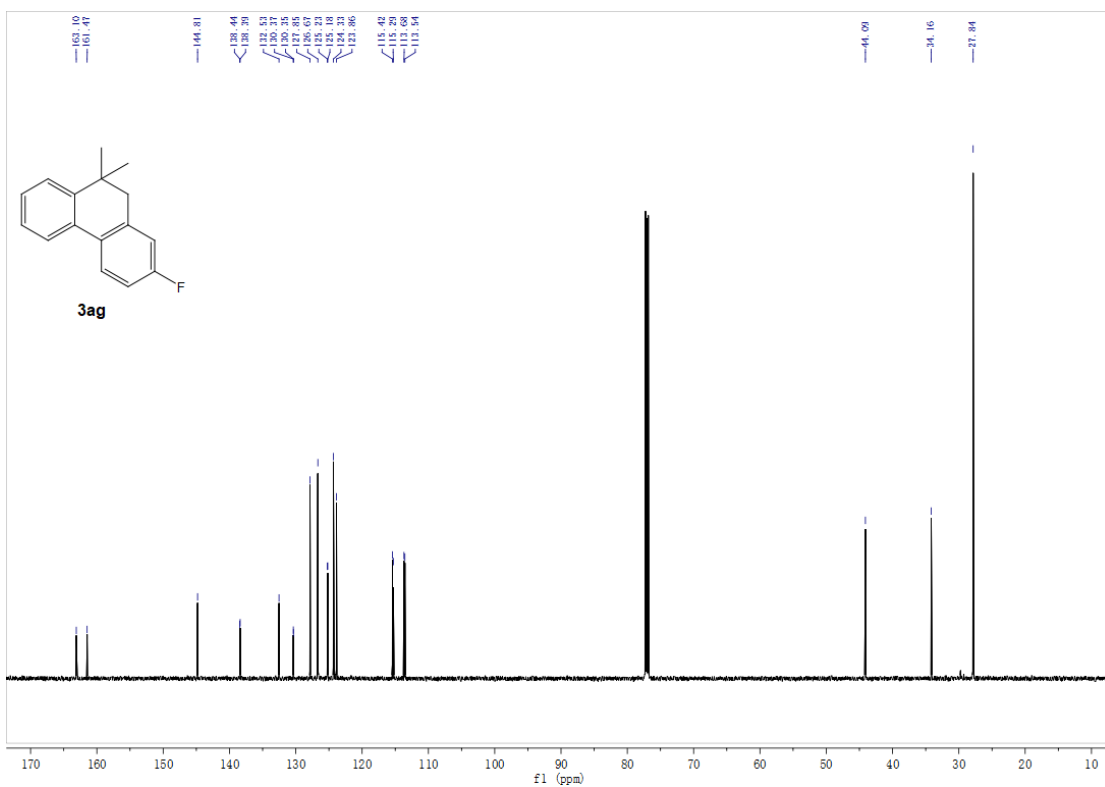

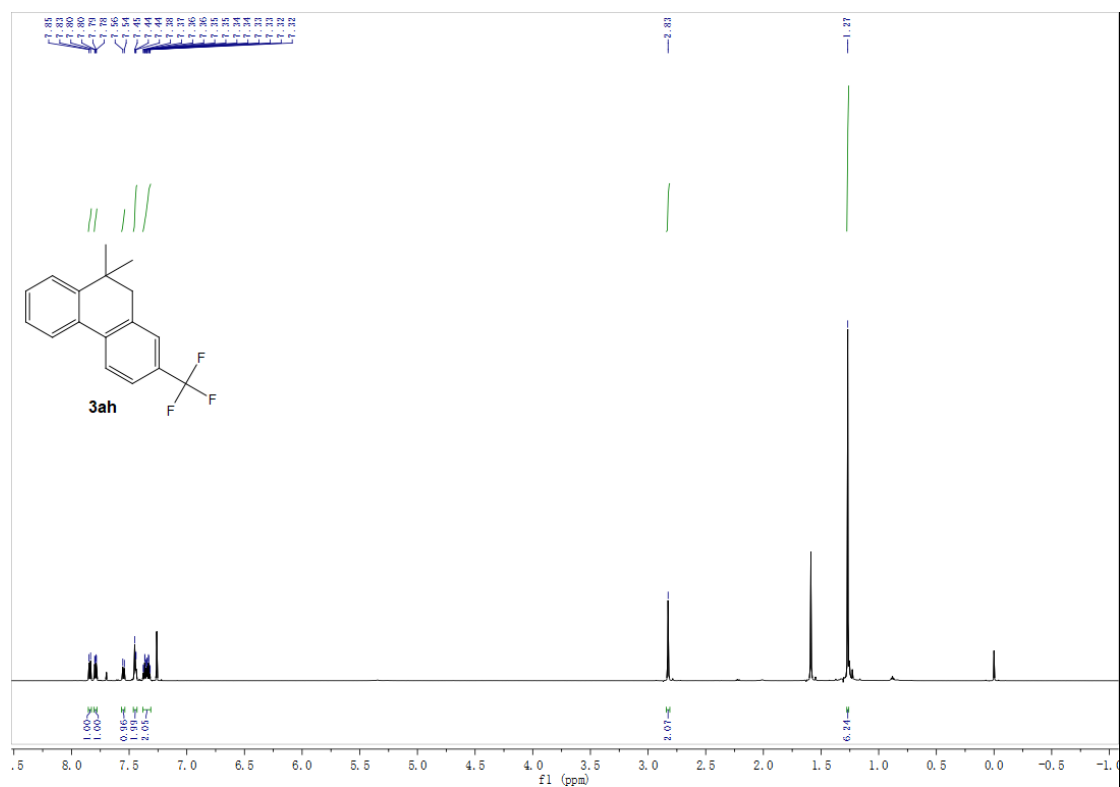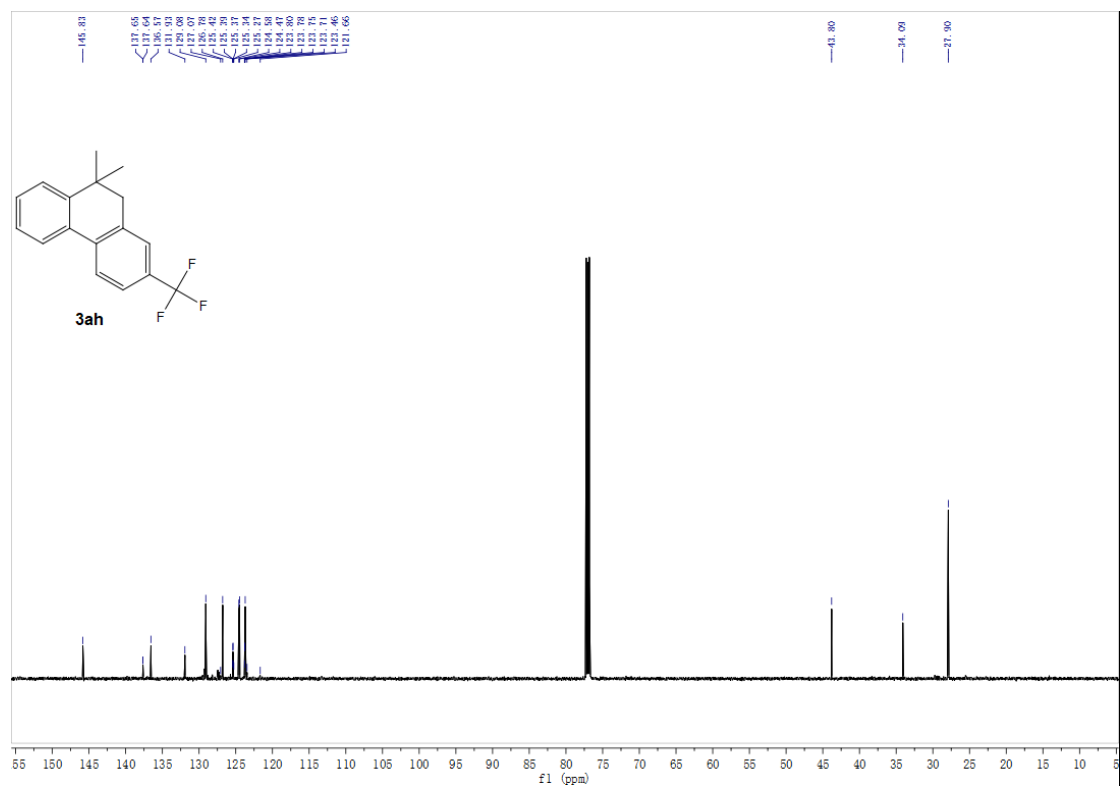

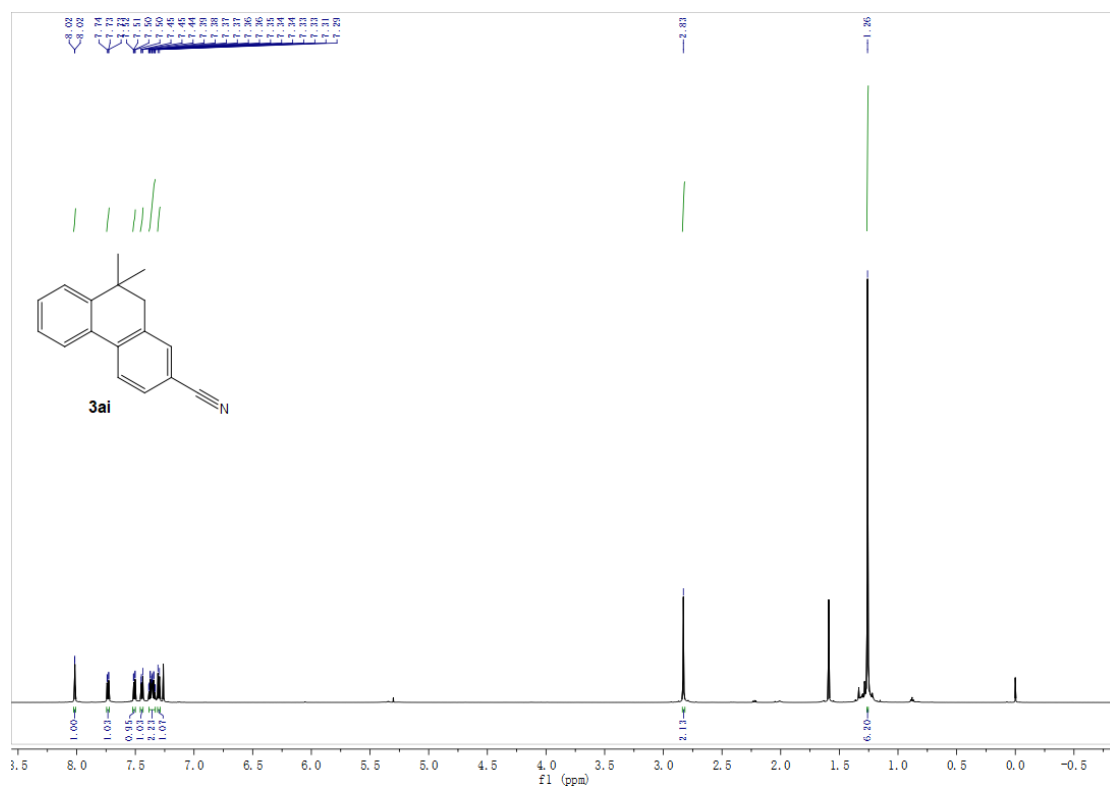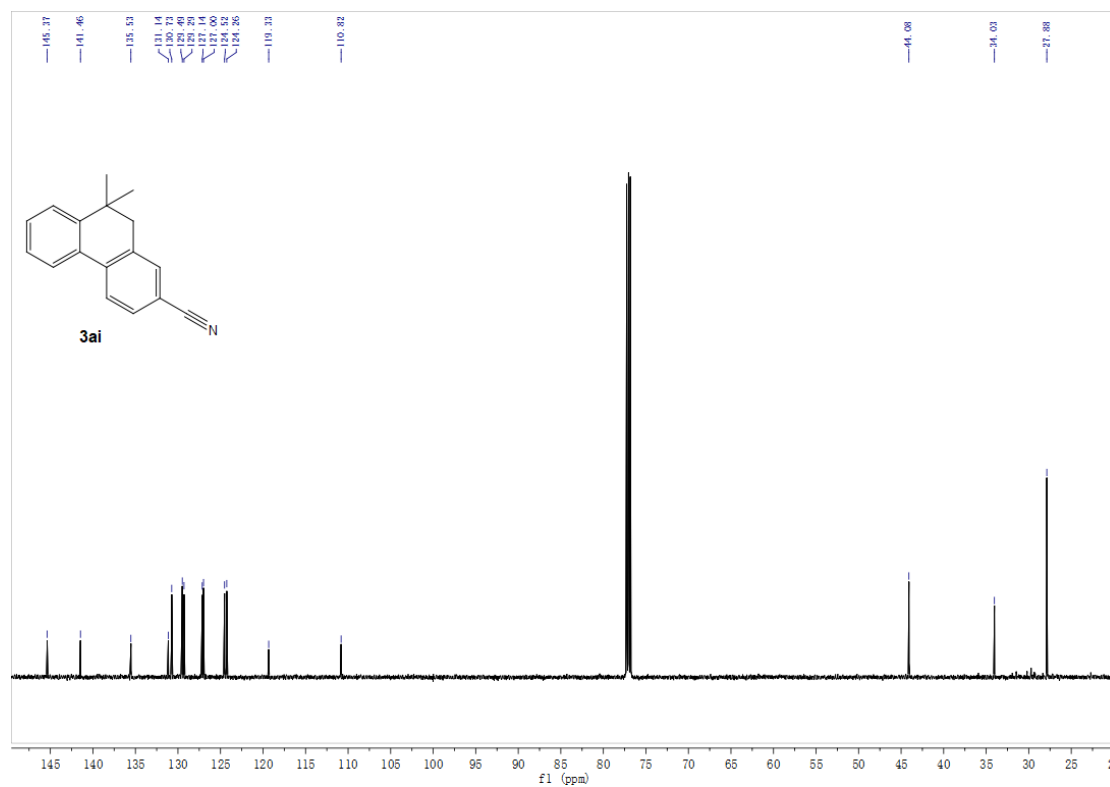

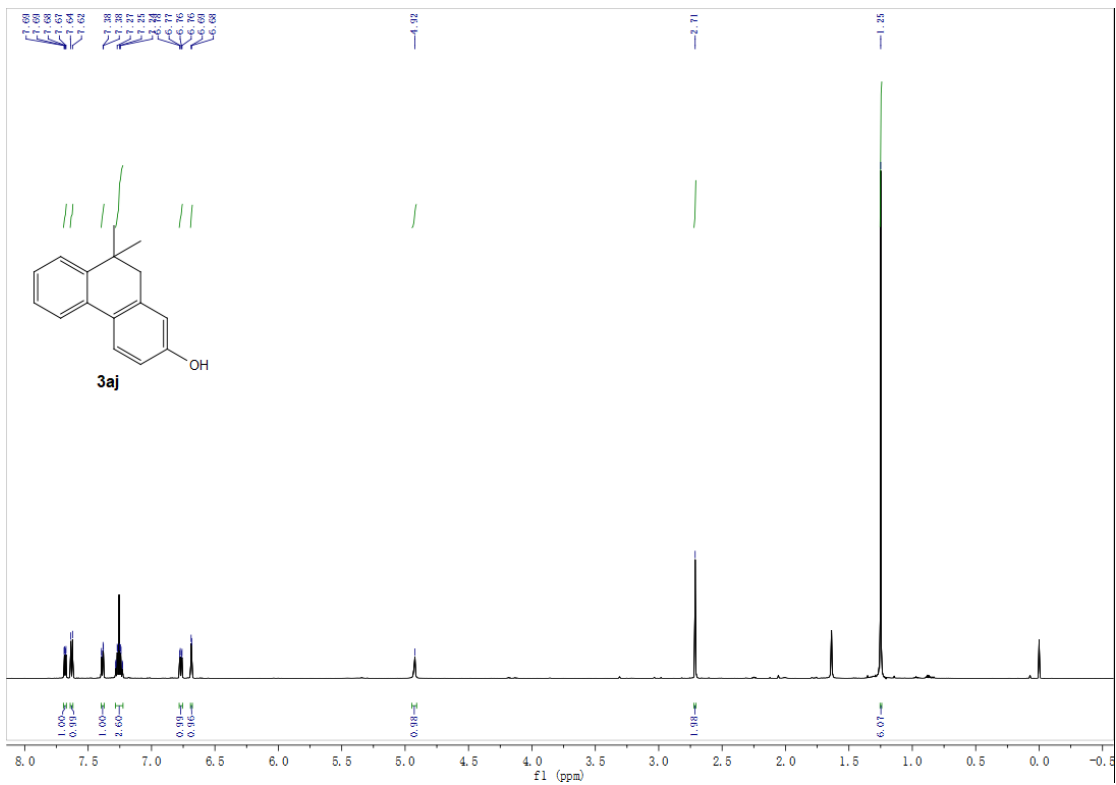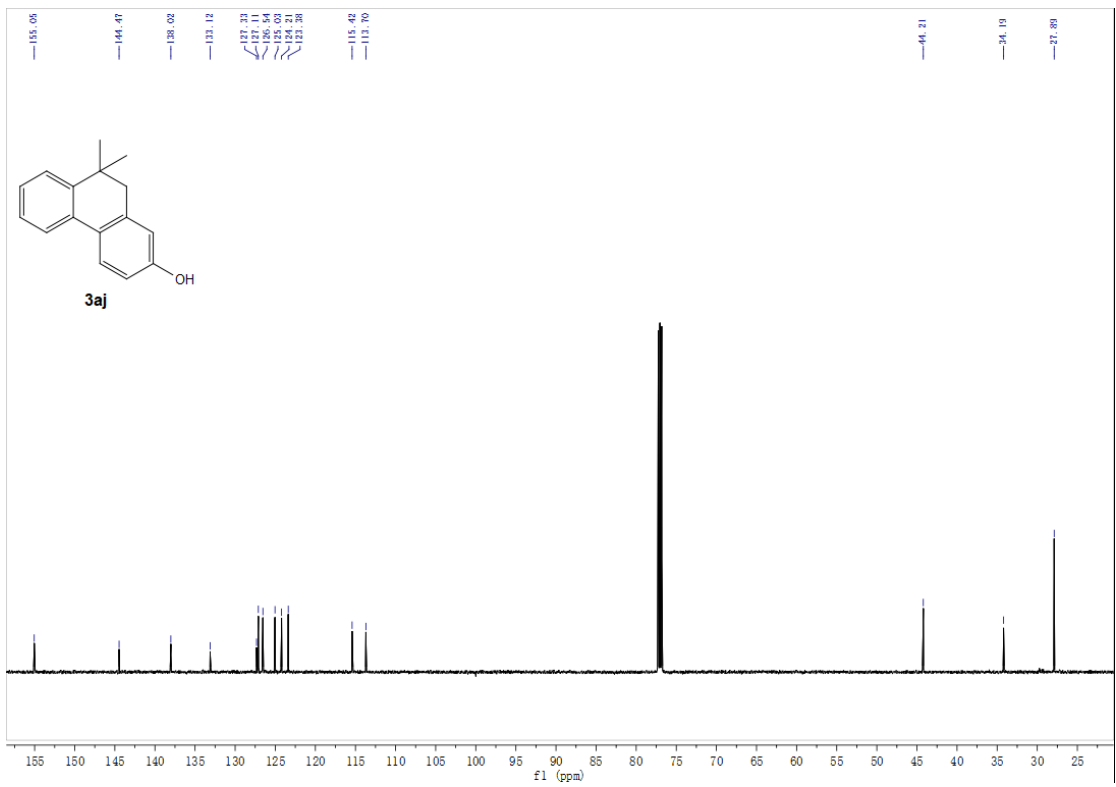



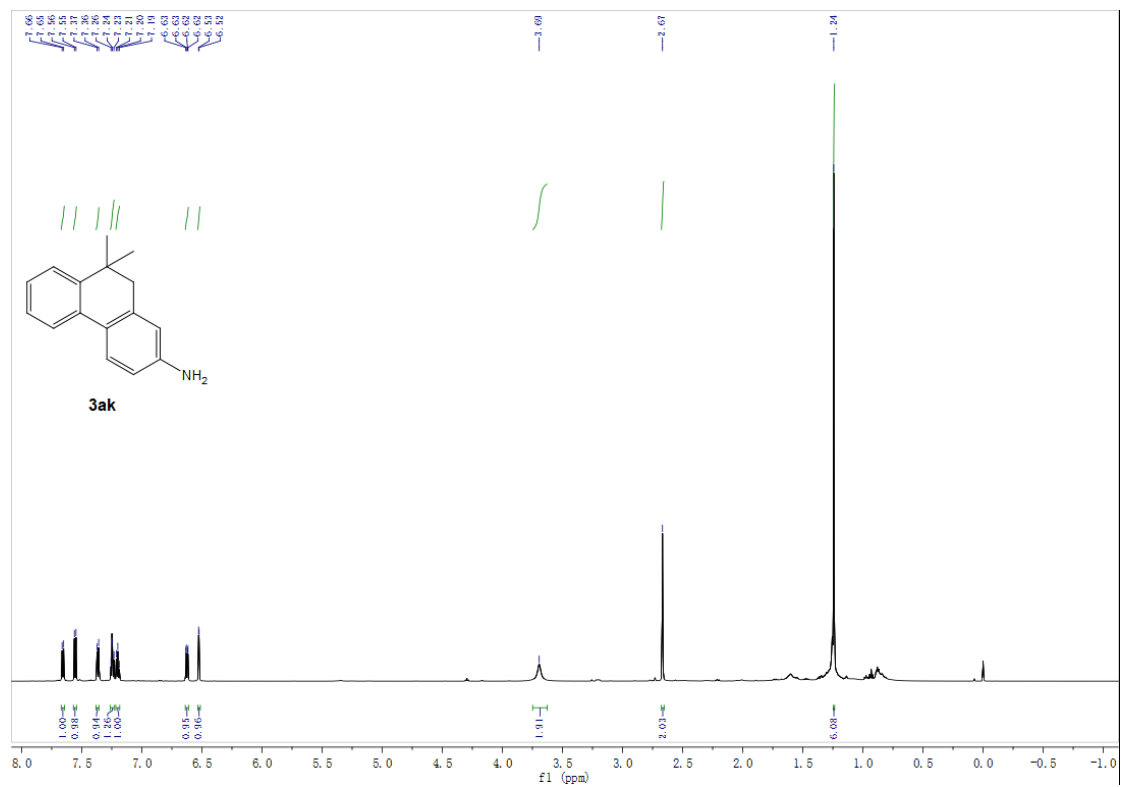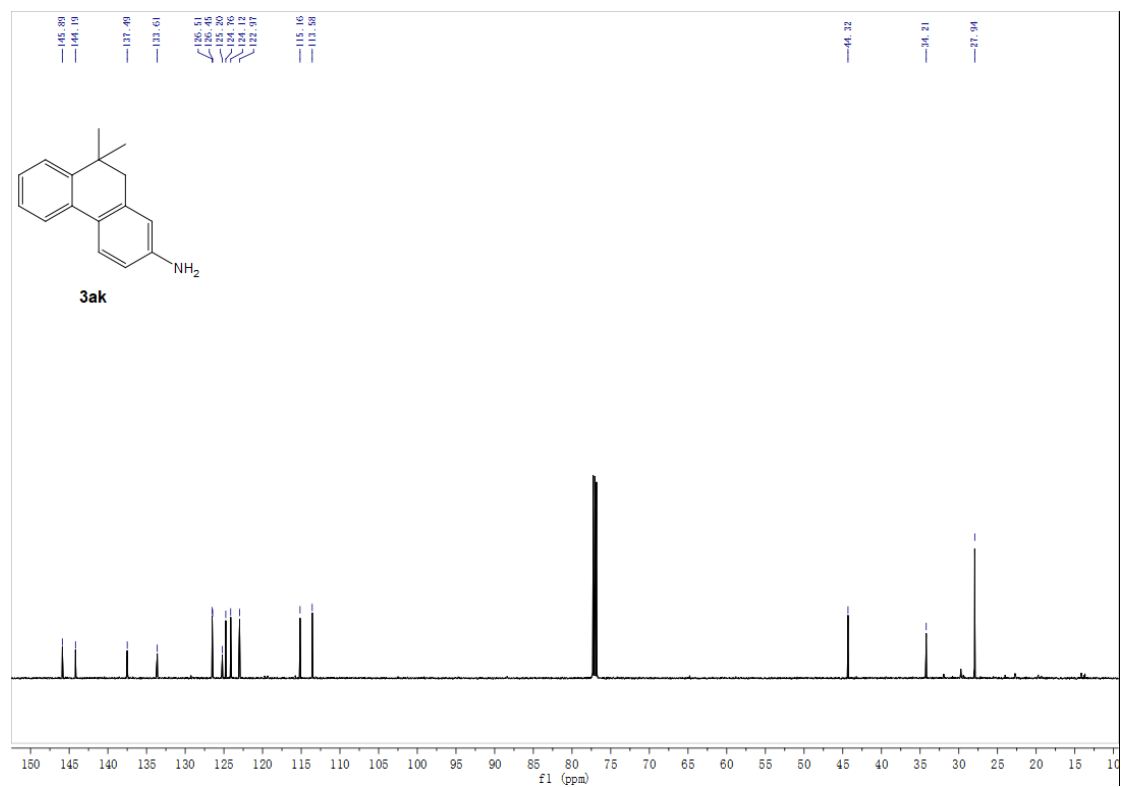

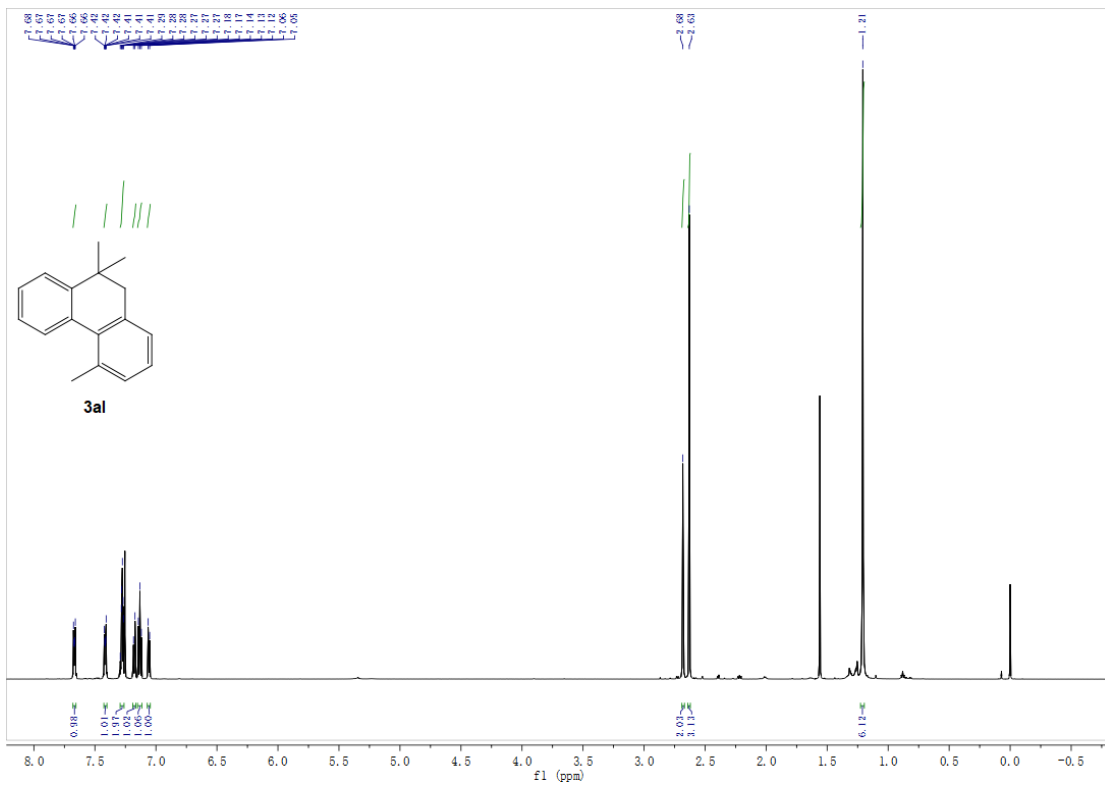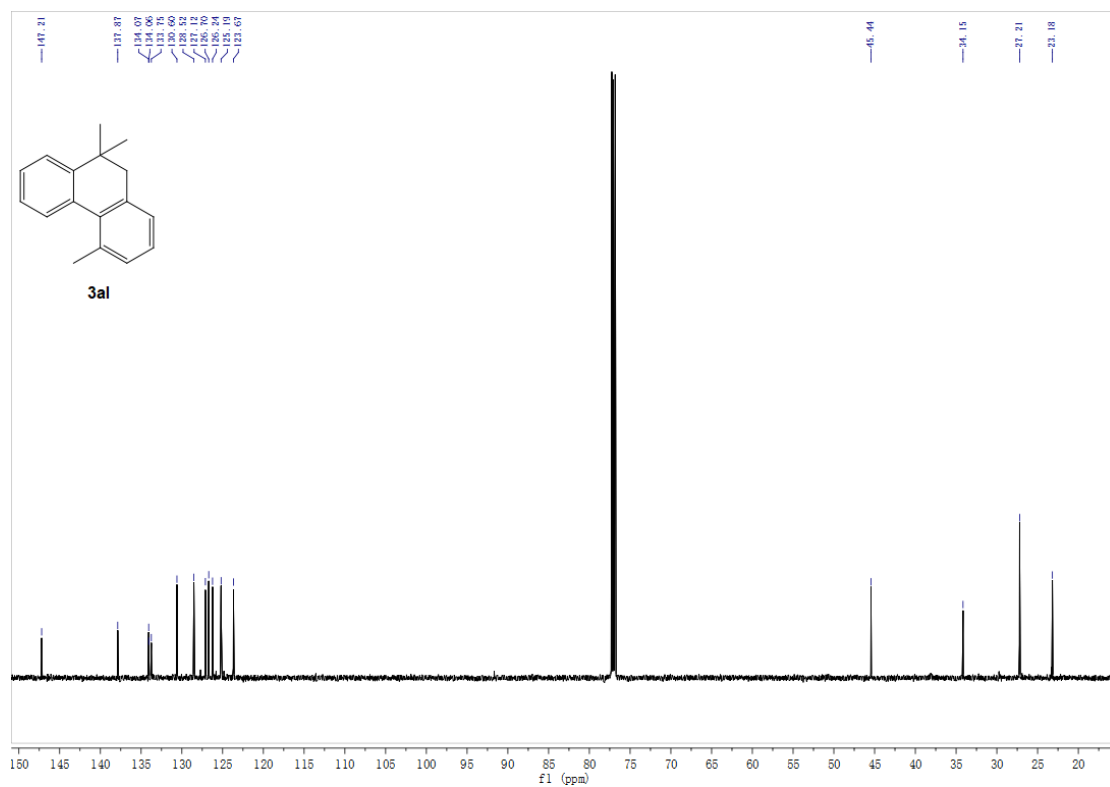

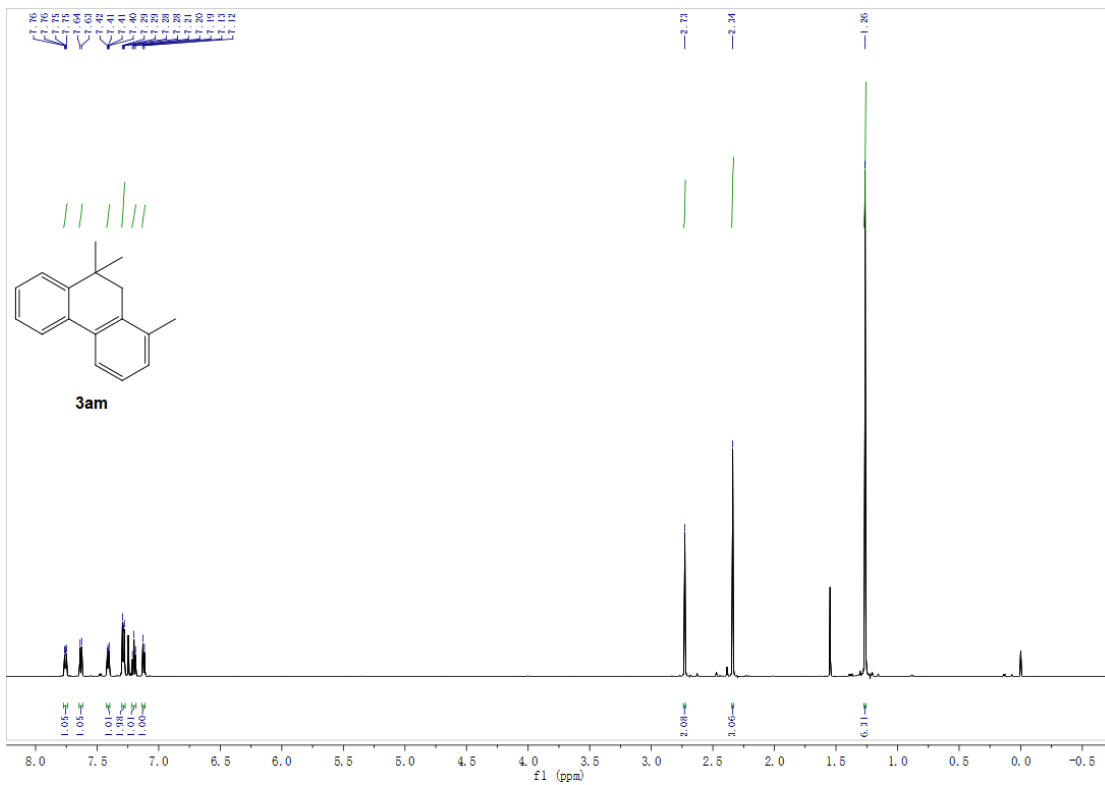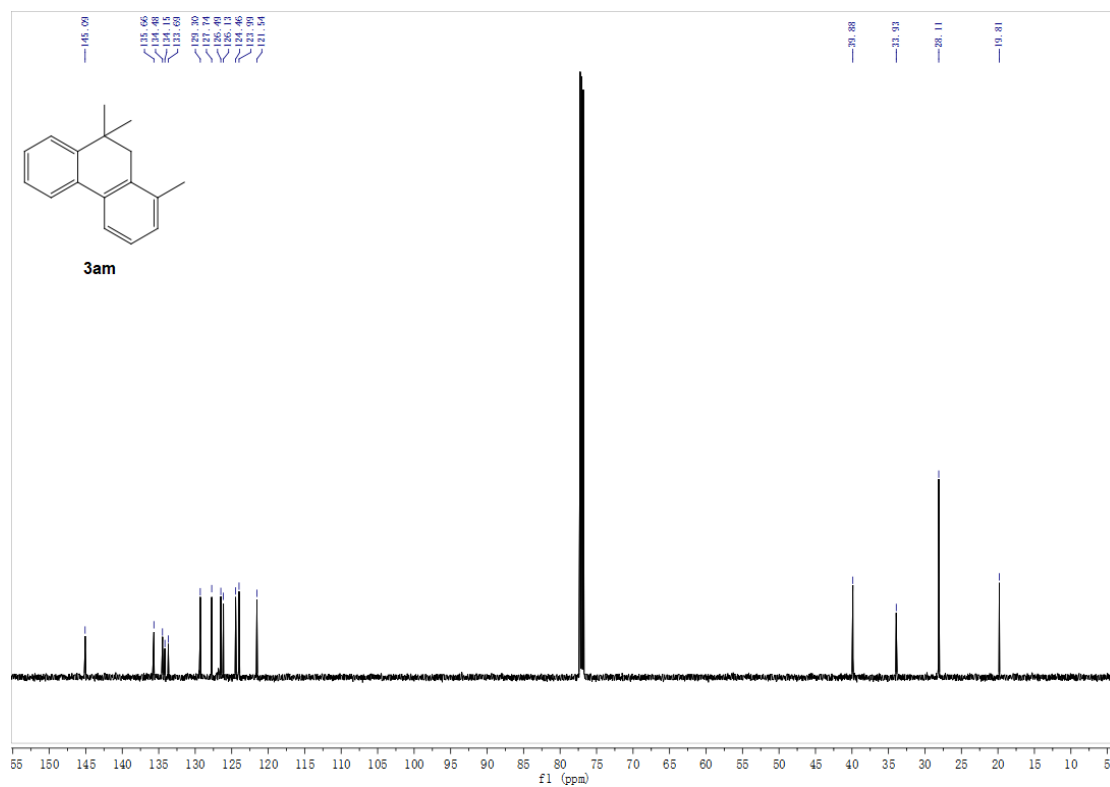

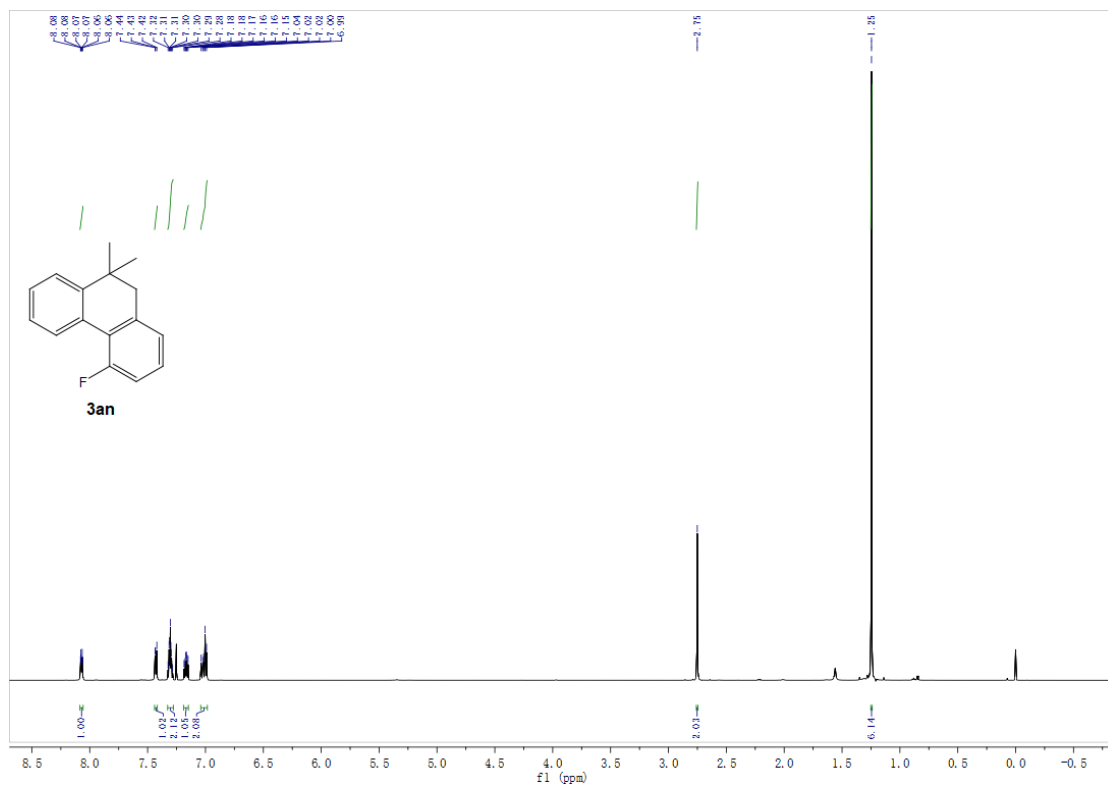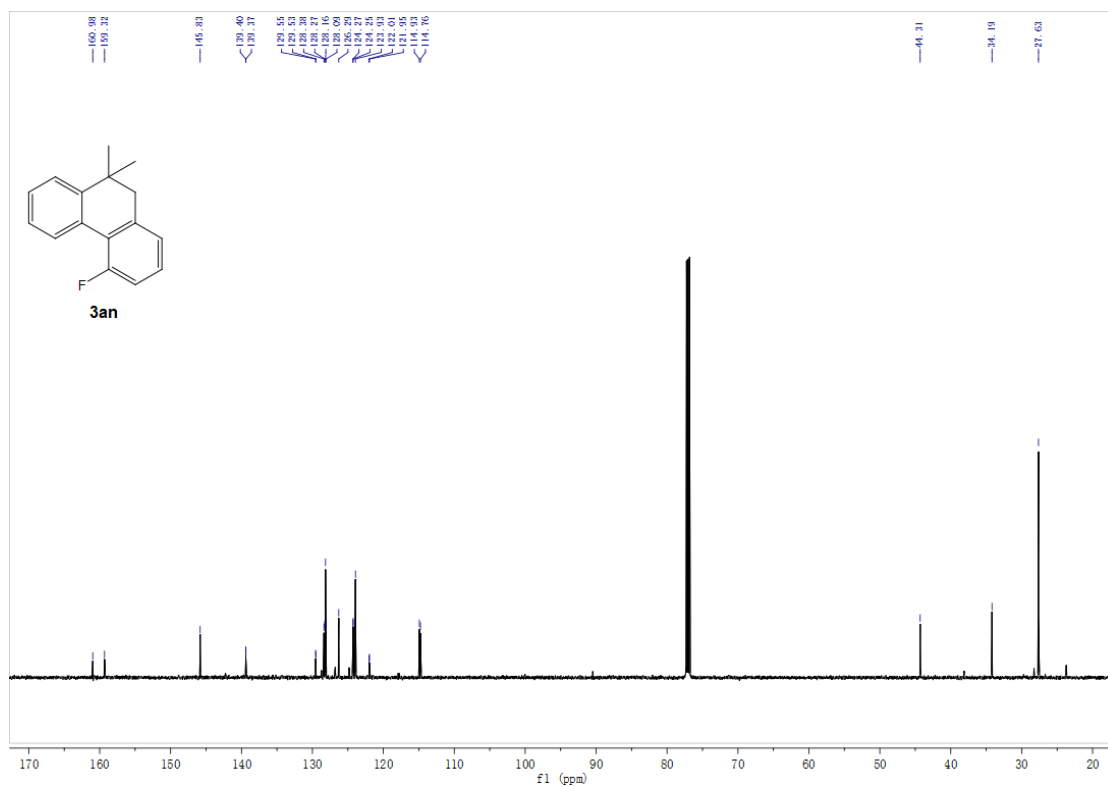

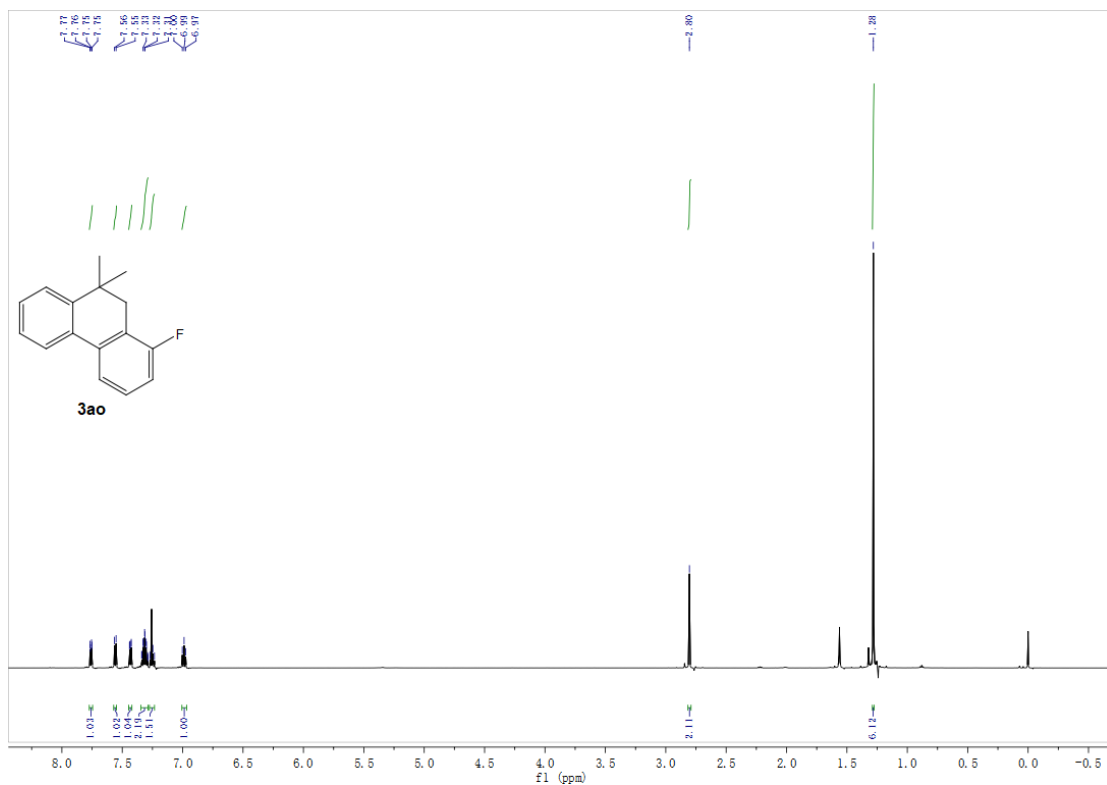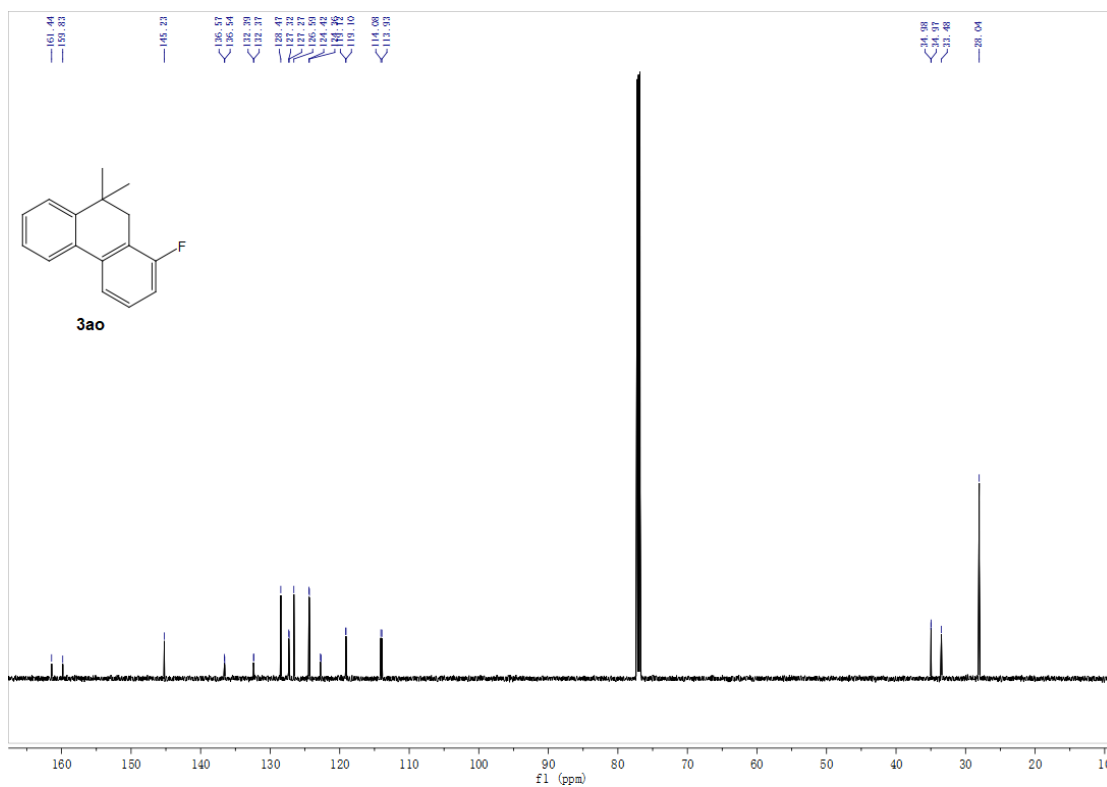

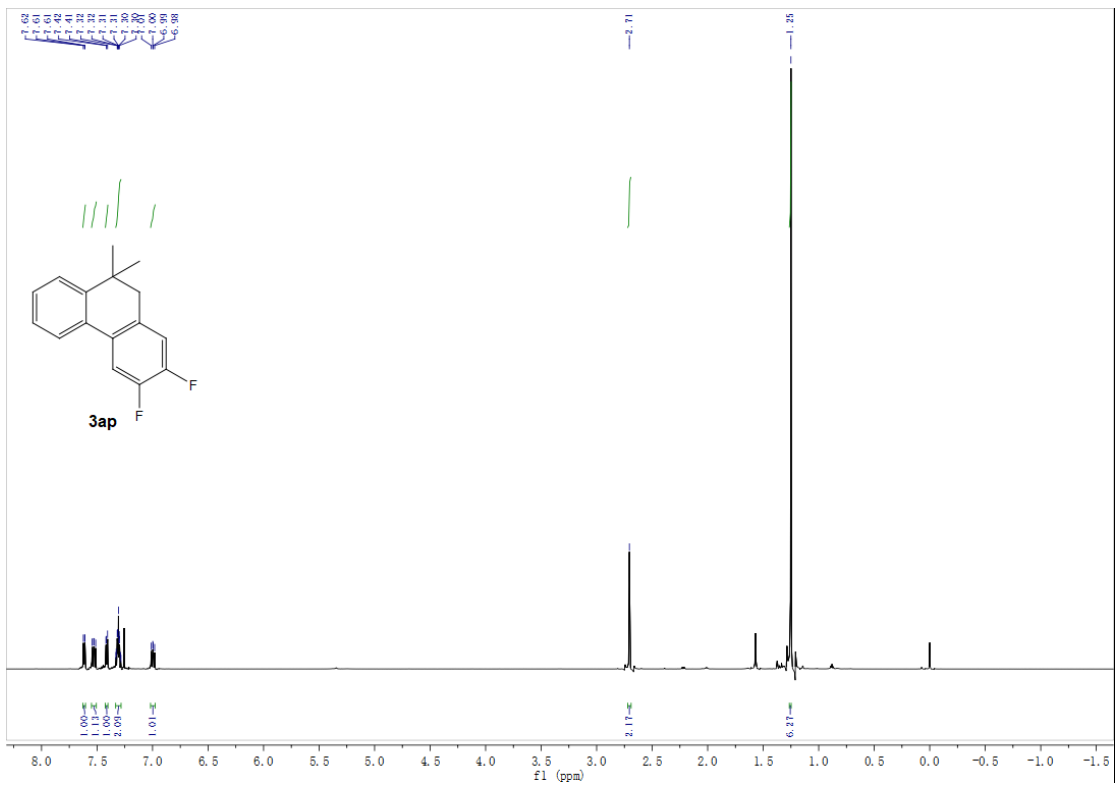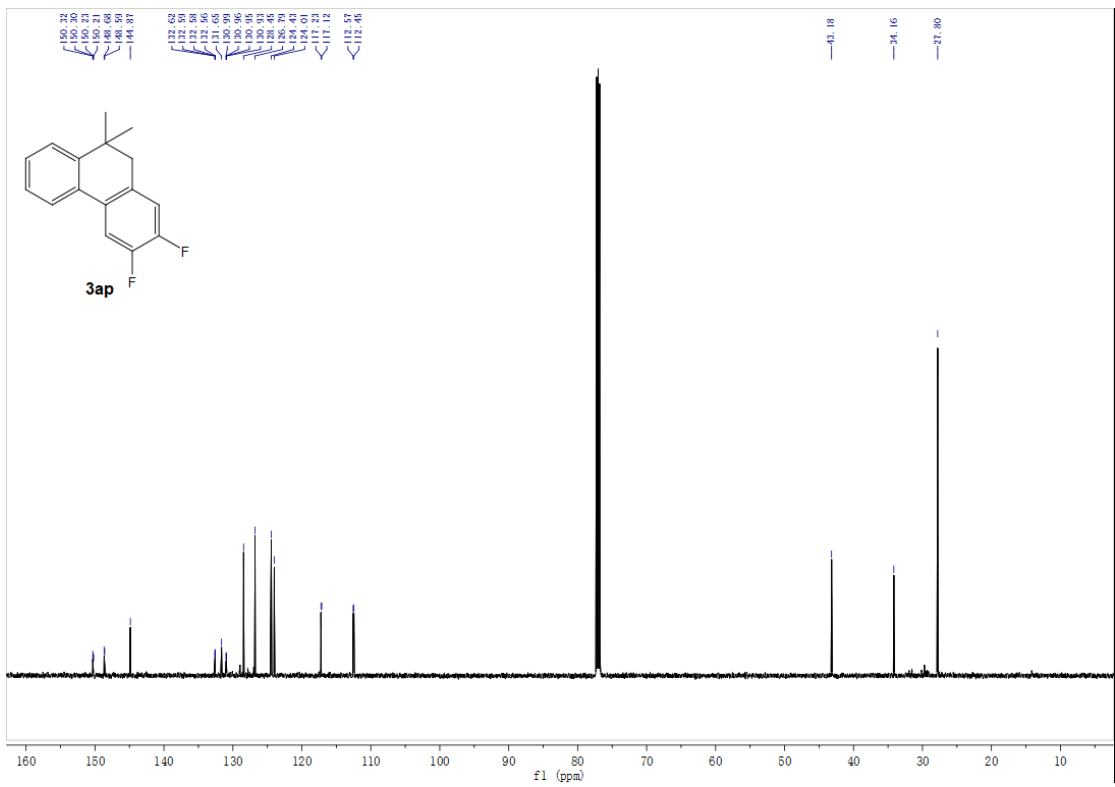

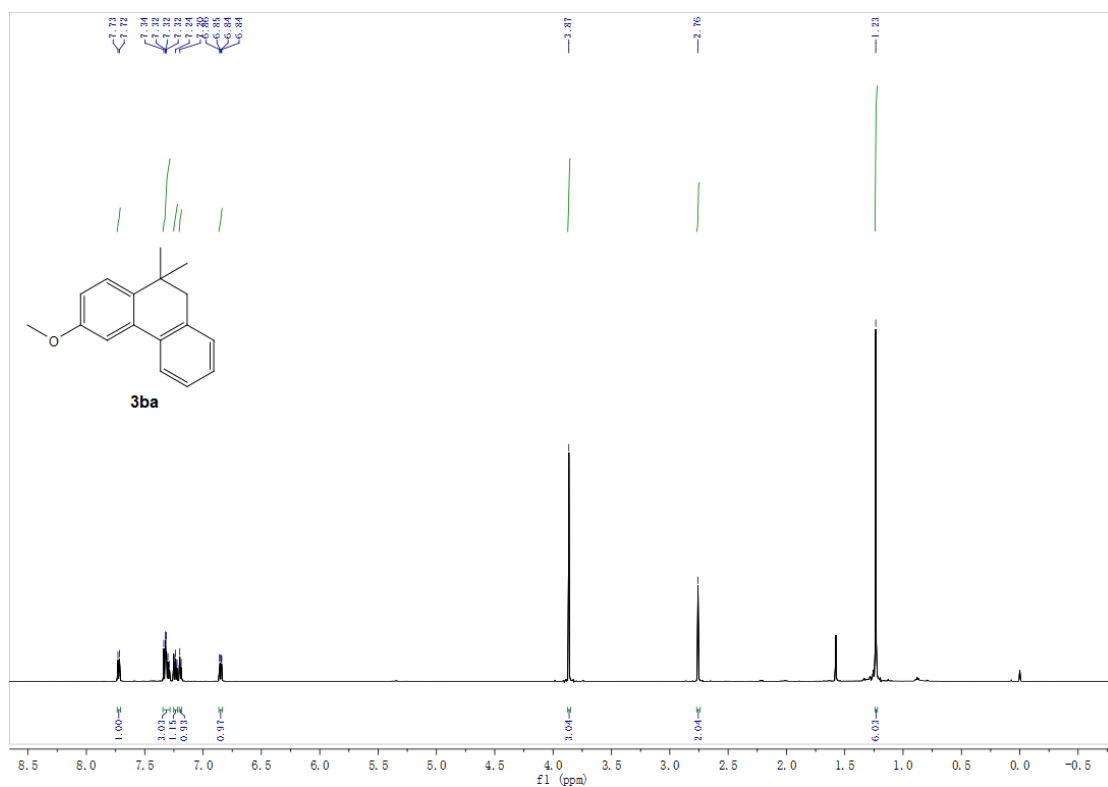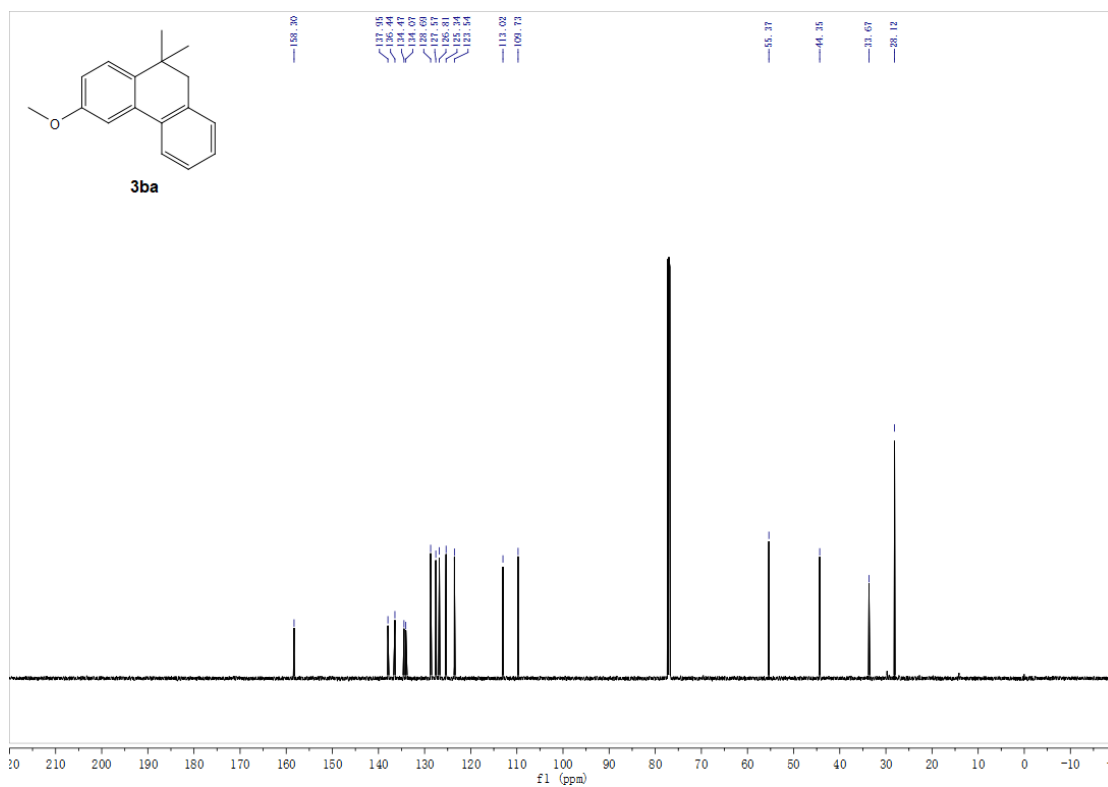

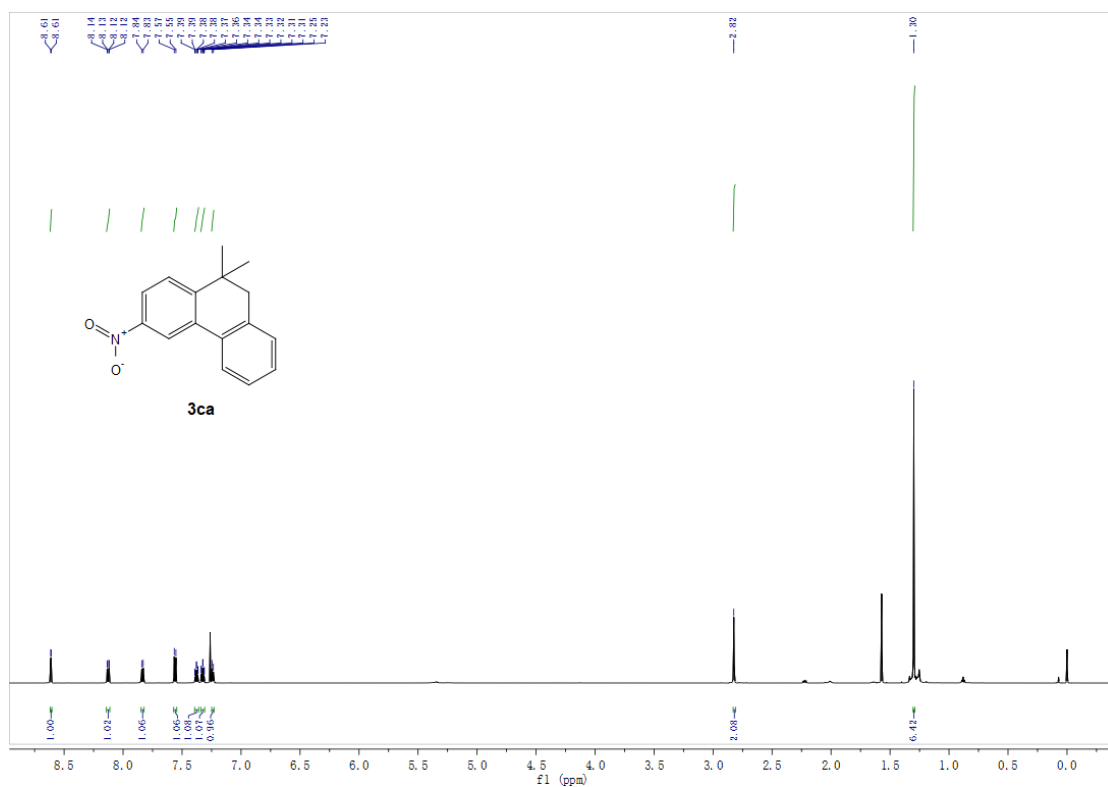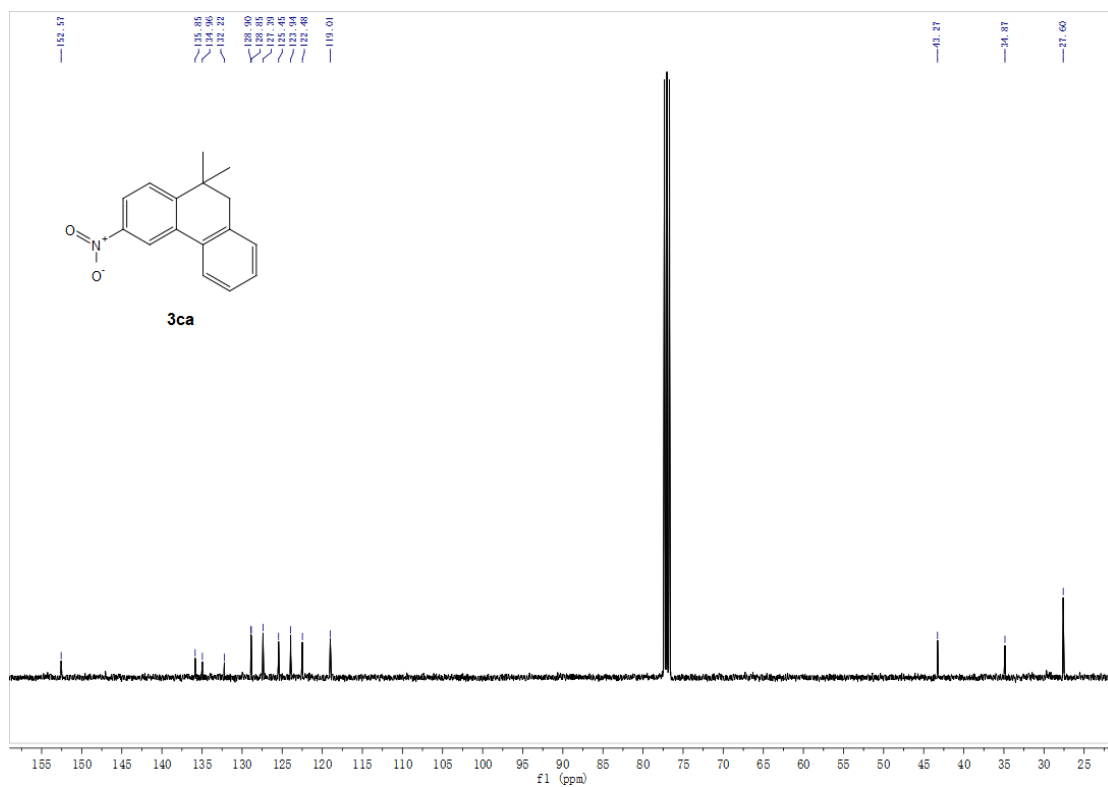



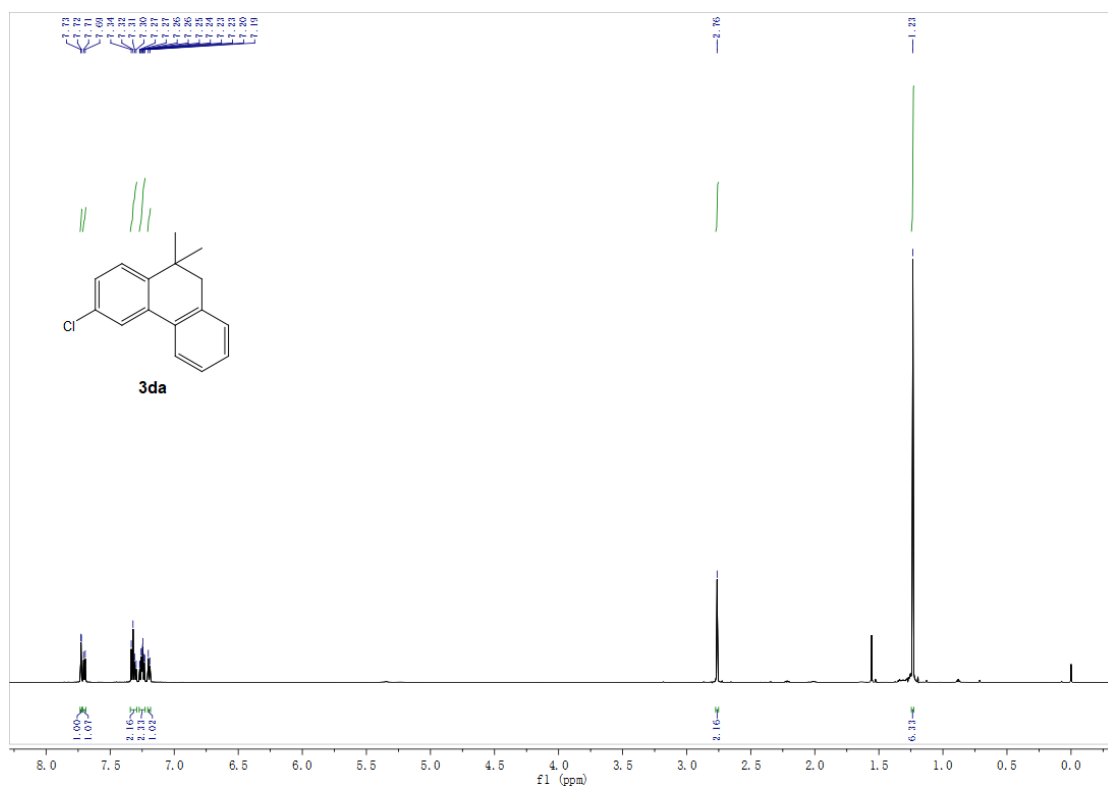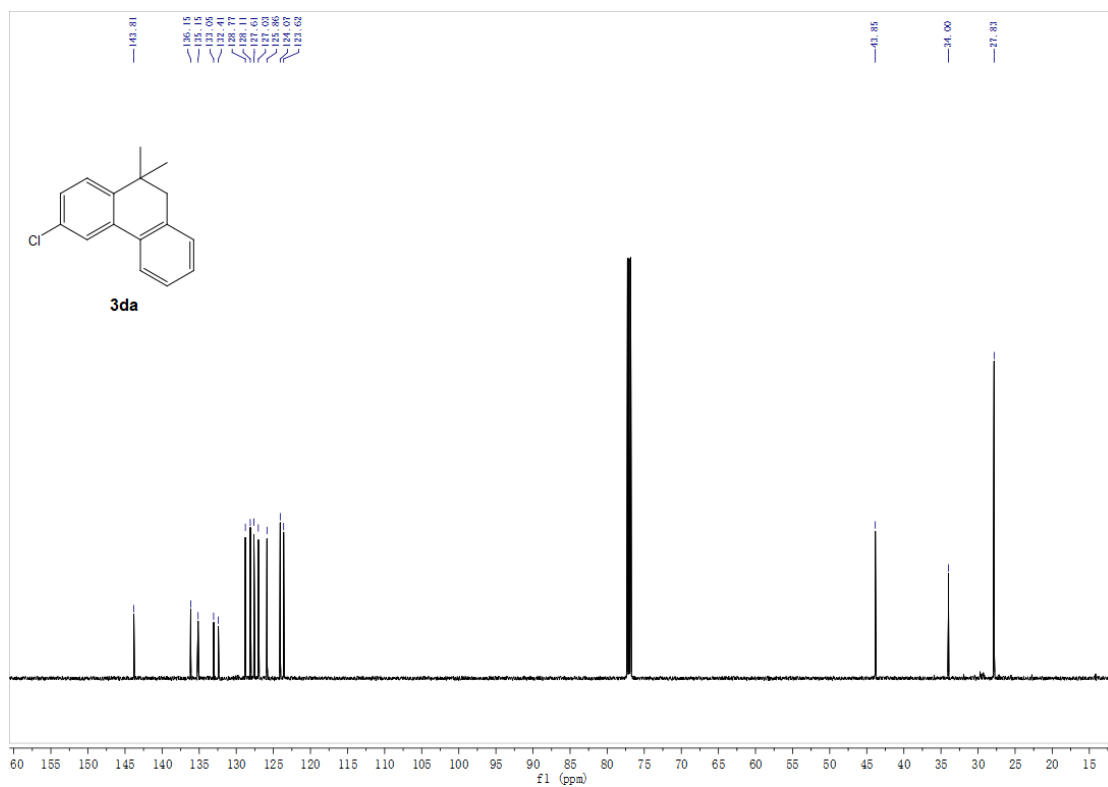

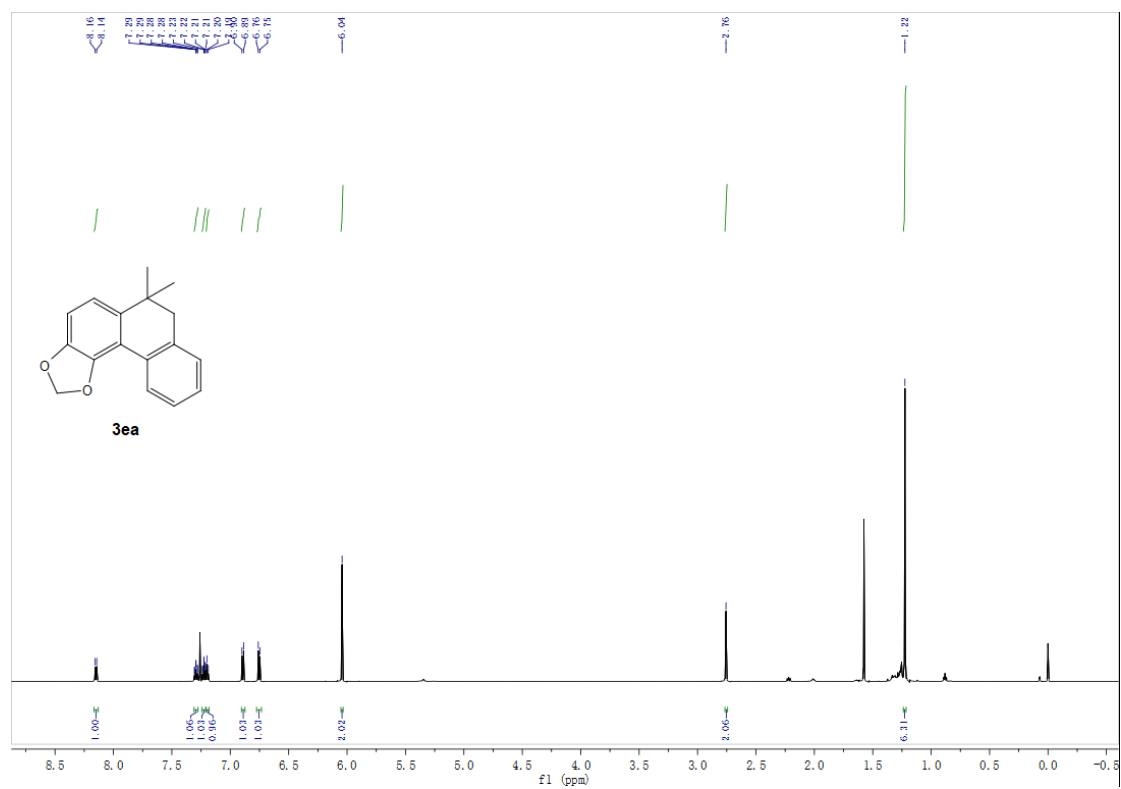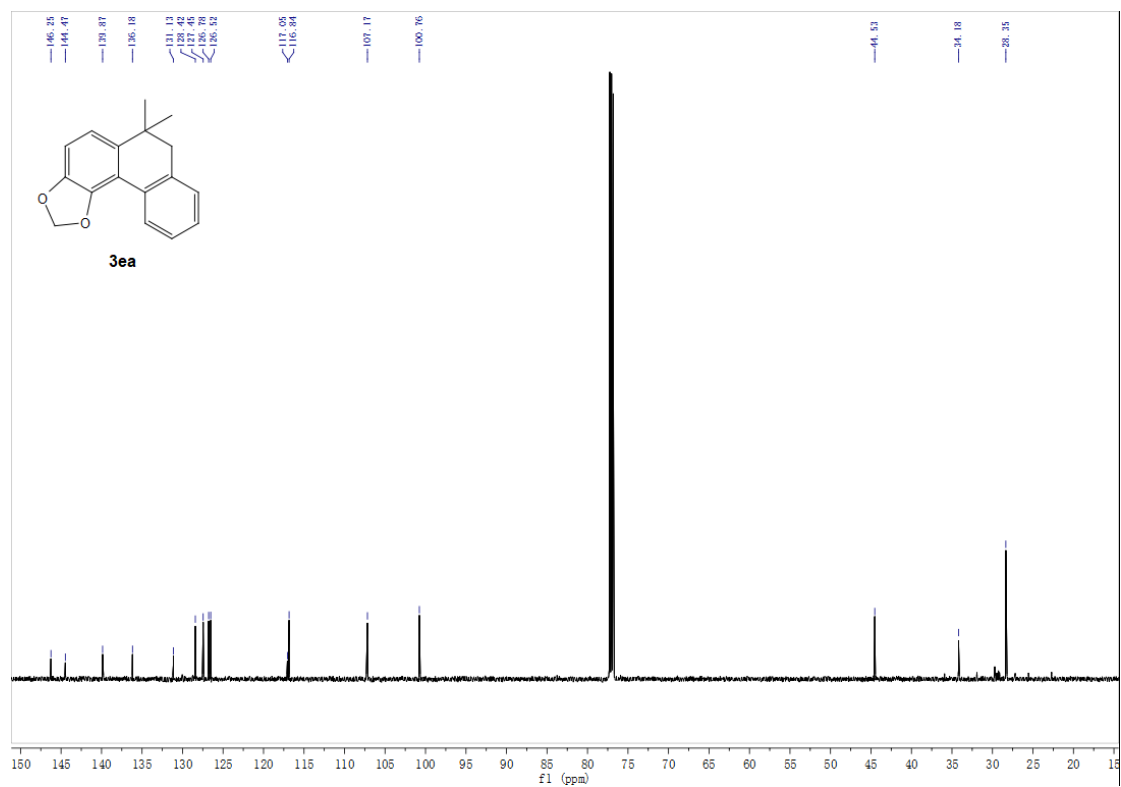

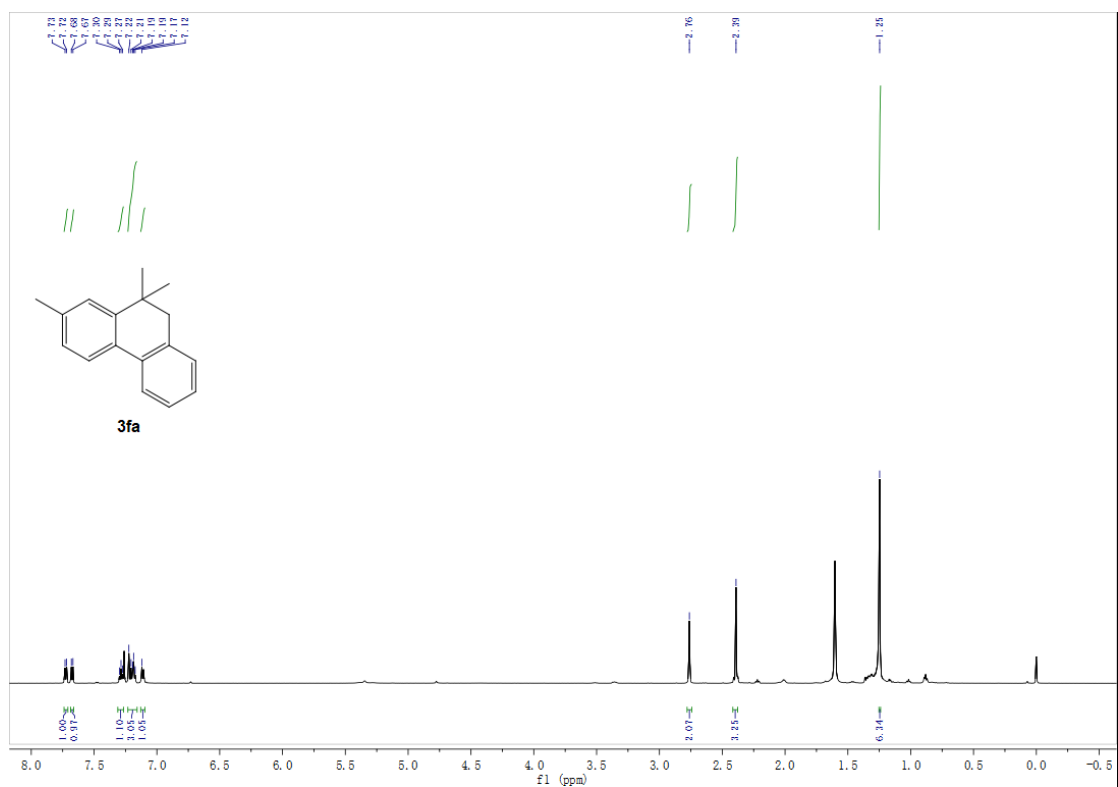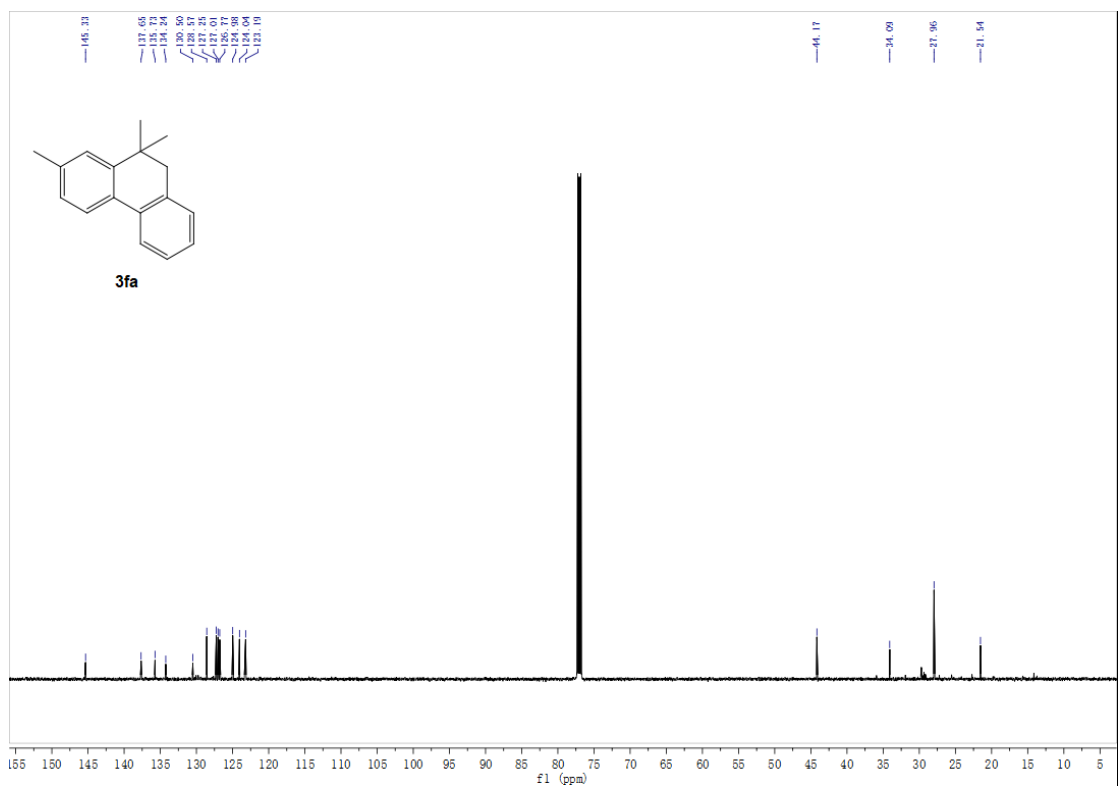

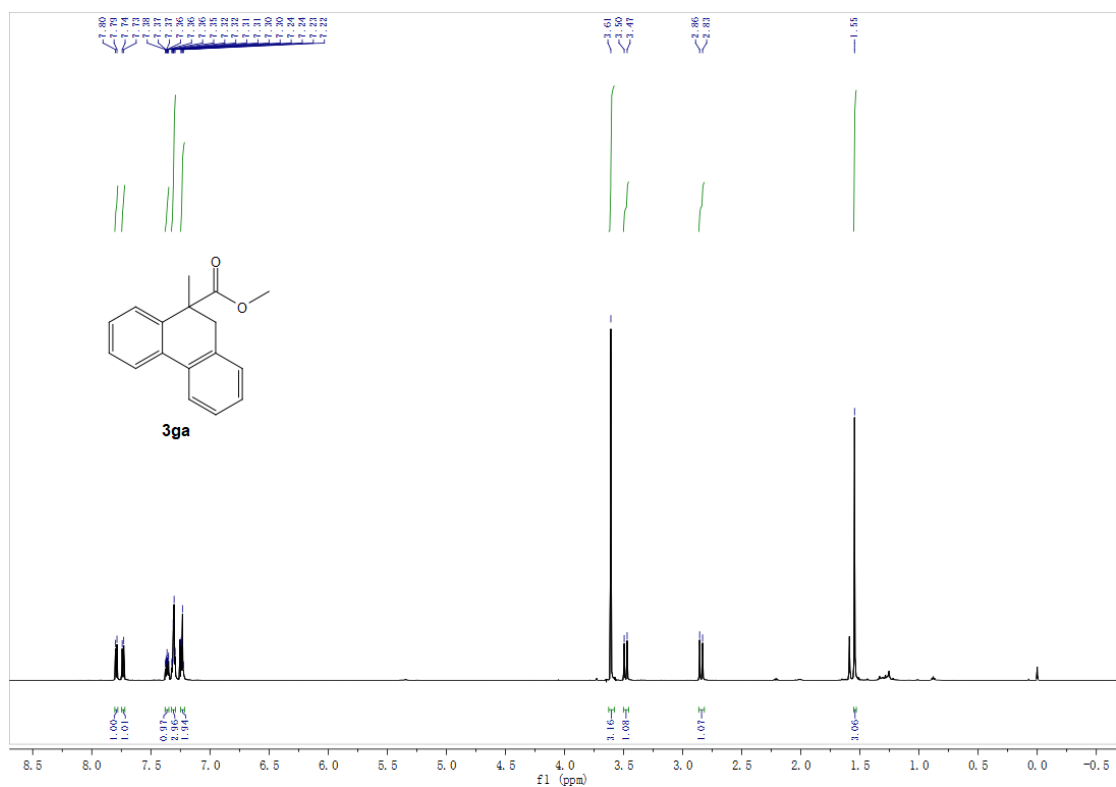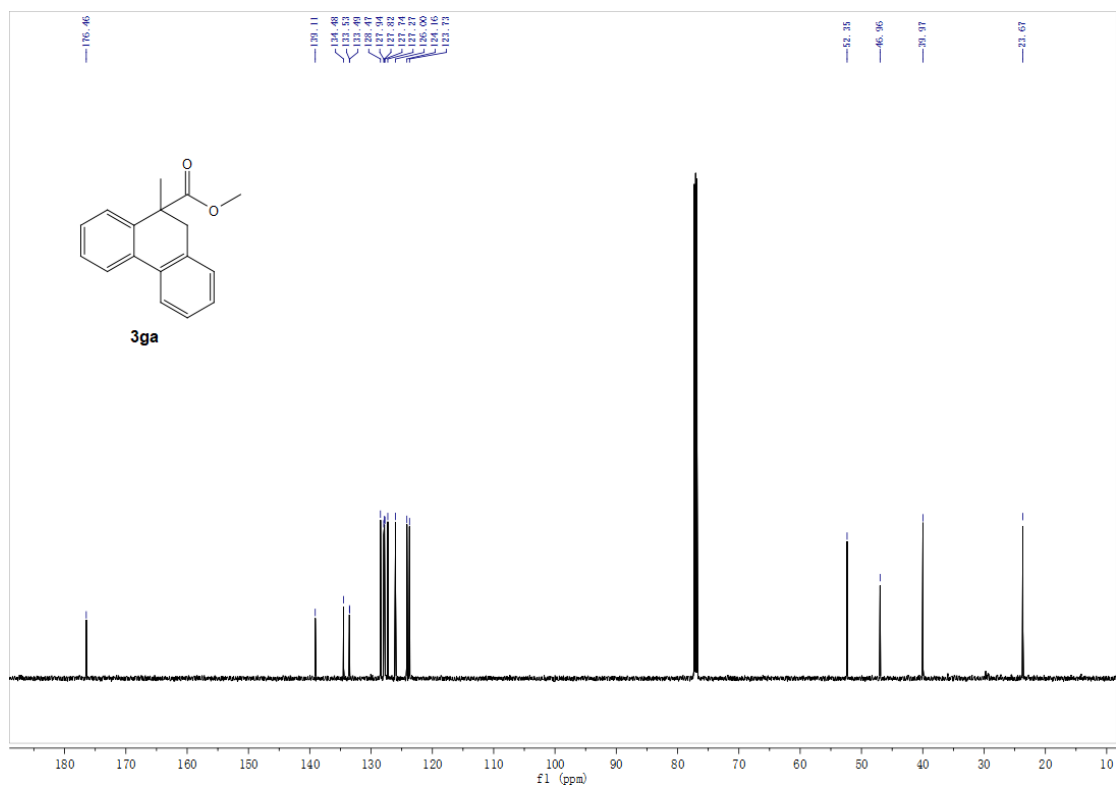

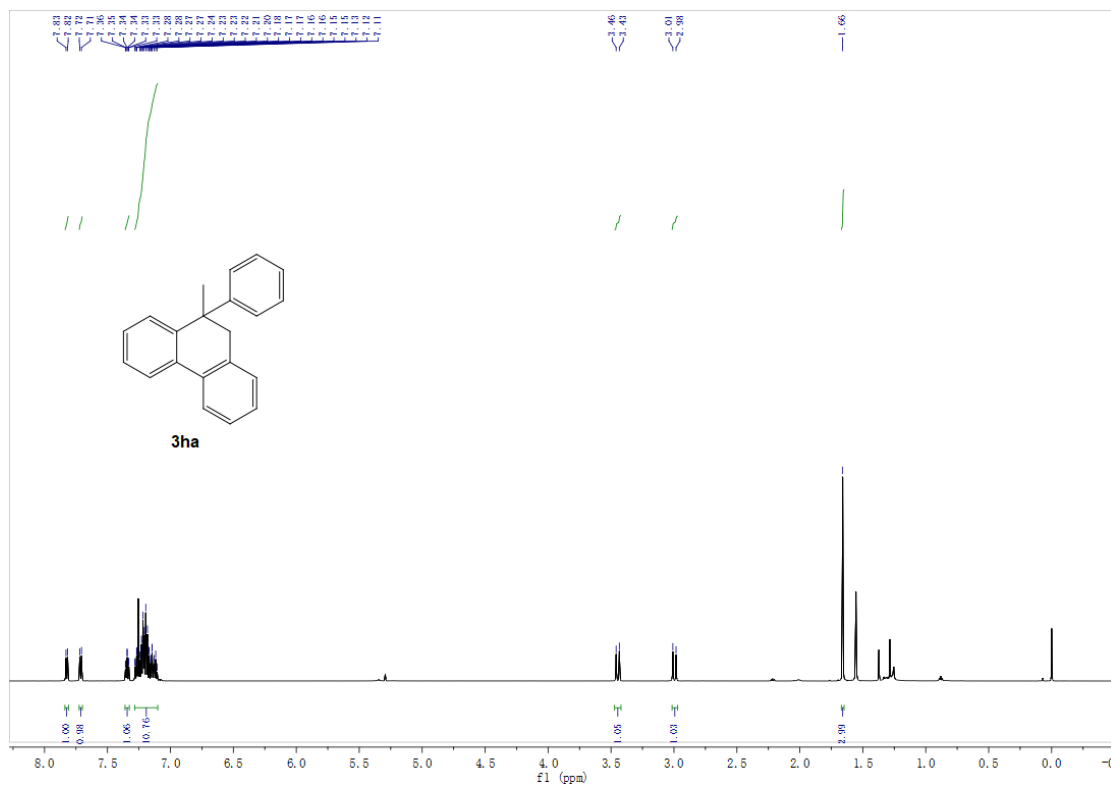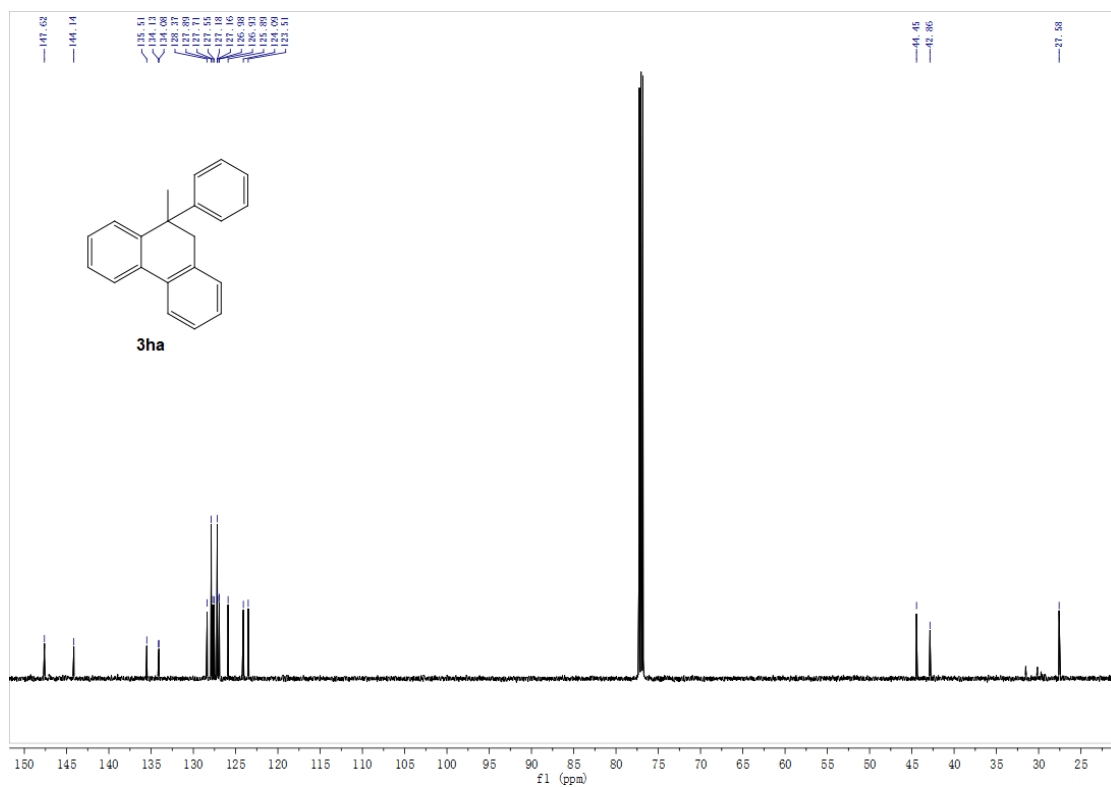

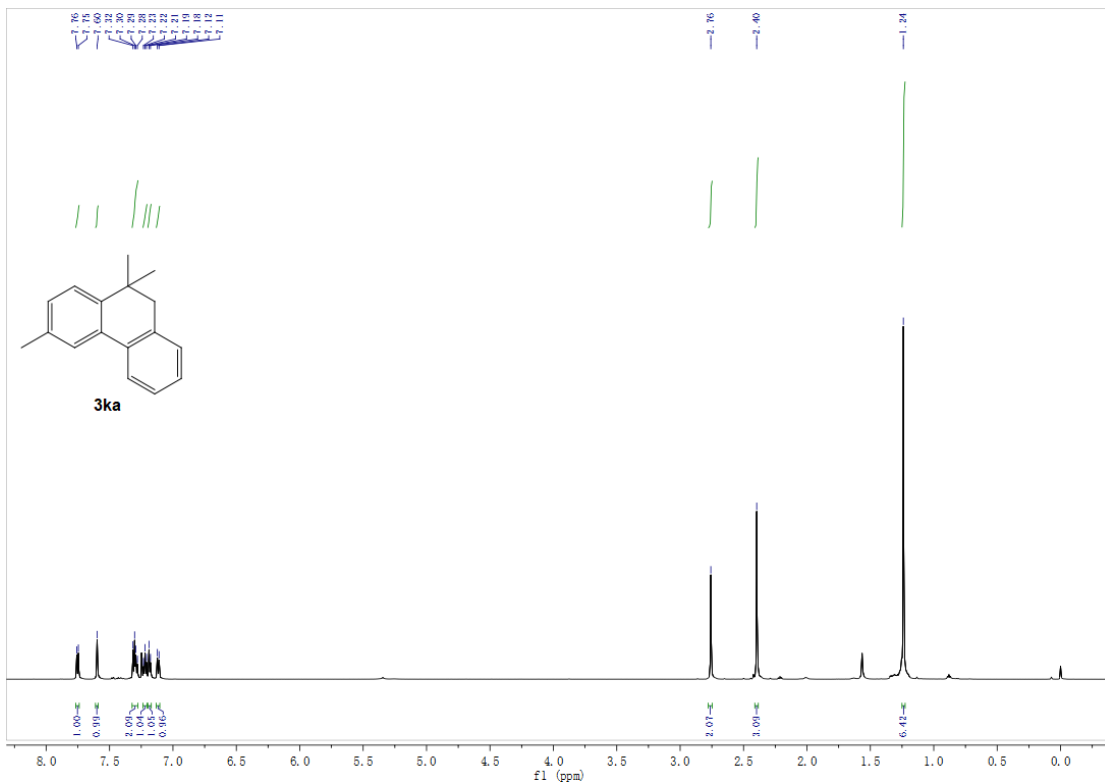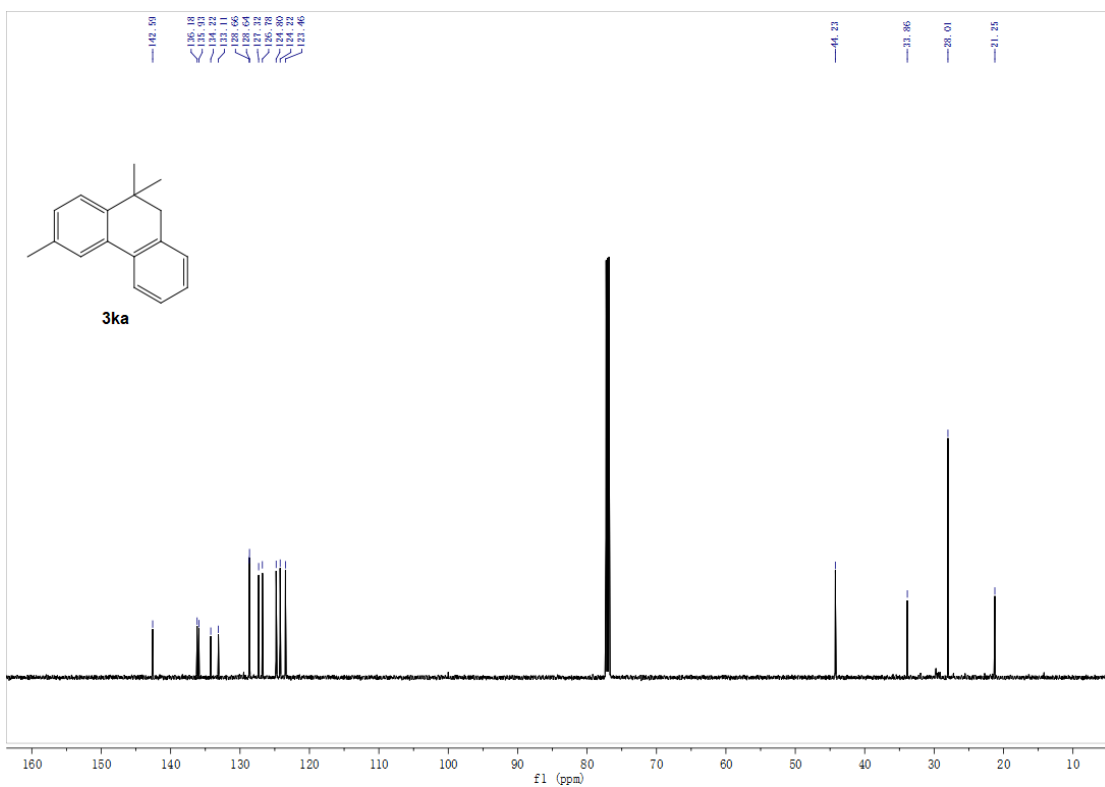

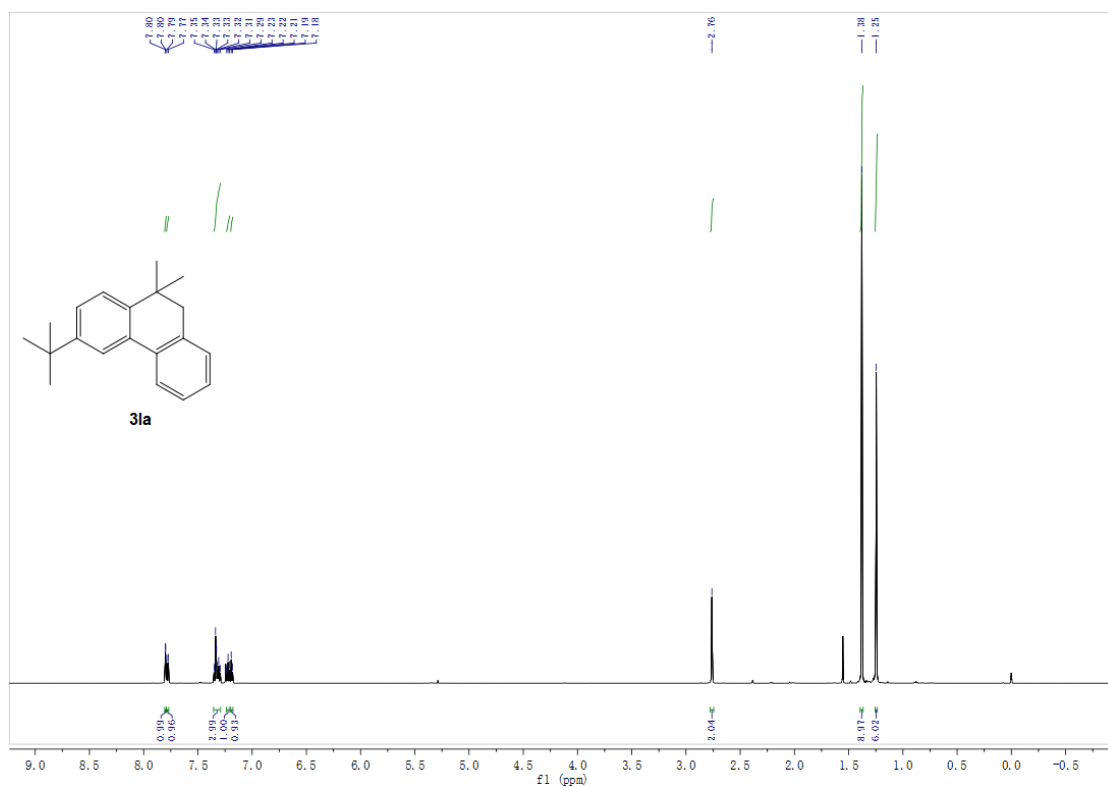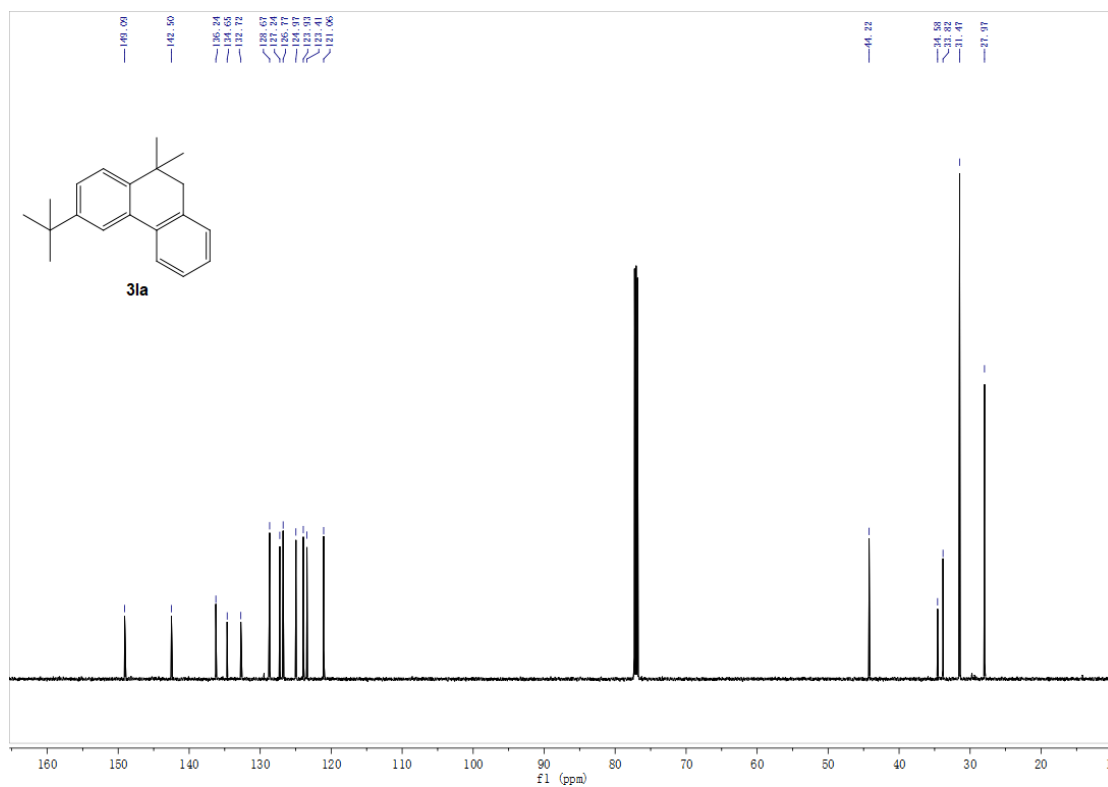

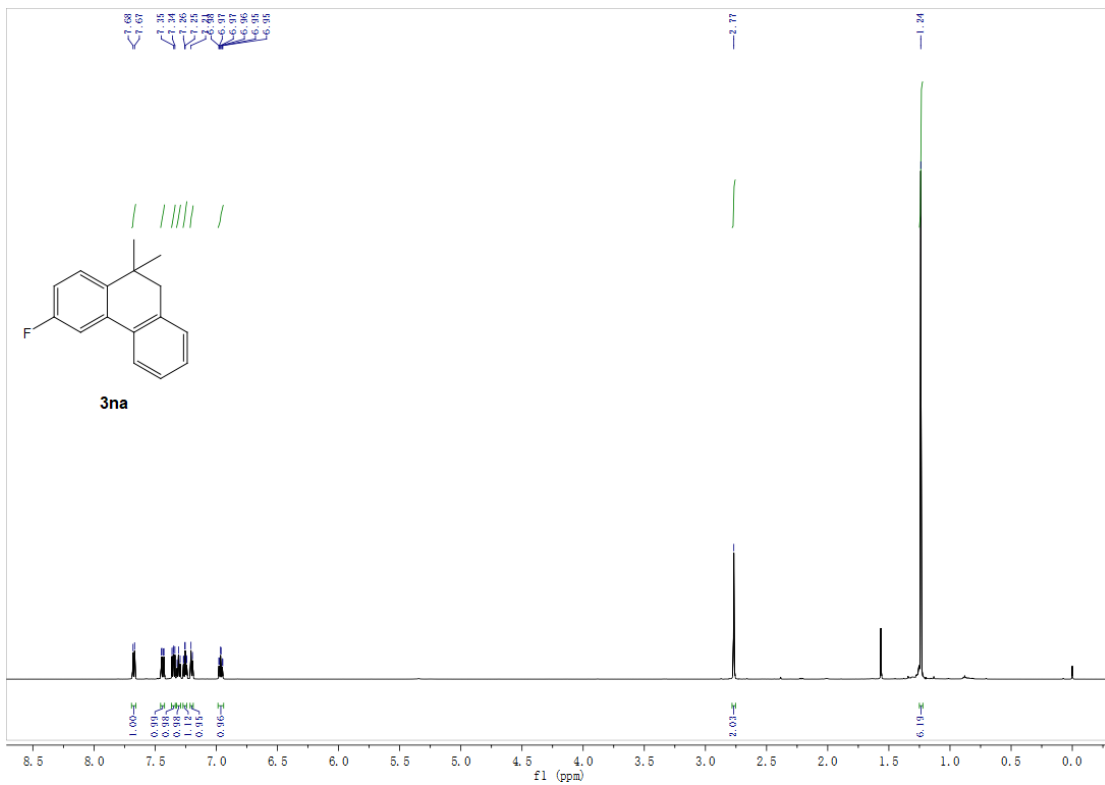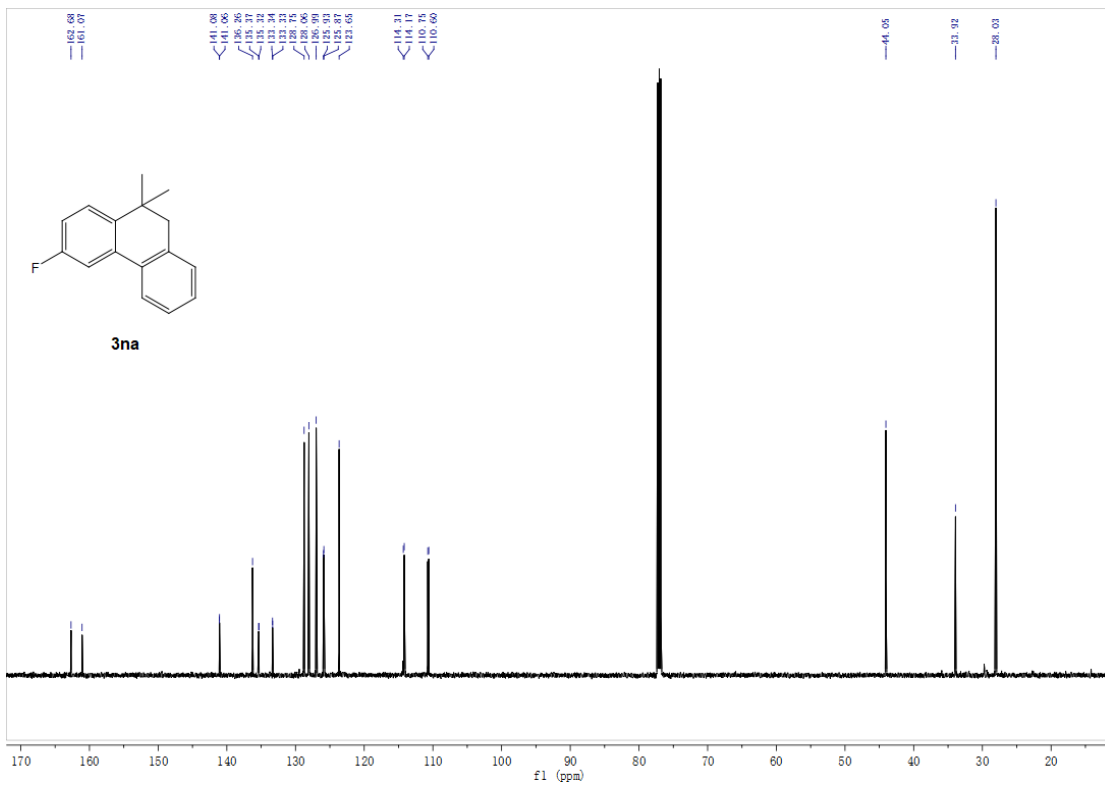

Supplement: d0cc04602g1.pdf [file d0cc04602g1.pdf]
